# Supplementary material
Source: publisher figshare collection journal article supplement (https://gsajournals.figshare.com/ndownloader/files/15520202)
Supplement: Supplementary file 1 [file 15520202]

## Sheet: Summary
	Tolerated	Deleterious	Average SIFT score
ADG	1	0	0.05
BFT	60	5	0.48
MFR	29	10	0.54
CRCL	114	21	0.39

## Sheet: ADG
rs80889625	7:36442289	G	ENSSSCG00000001612	ENSSSCT00000001792	Transcript	missense_variant	1475	1475	492	L/R	cTg/cGg	-	IMPACT=MODERATE;STRAND=1;VARIANT_CLASS=SNV;SOURCE=Ensembl;NEAREST=ENSSSCG00000001612;SIFT=tolerated(0.05)

## Sheet: BFT
rs711081004	2:235015	C	ENSSSCG00000024569	ENSSSCT00000029231	Transcript	missense_variant	1428	1349	450	Q/R	cAg/cGg	-	IMPACT=MODERATE;STRAND=-1;VARIANT_CLASS=SNV;SYMBOL=ANO9;SYMBOL_SOURCE=HGNC;HGNC_ID=HGNC:20679;SOURCE=Ensembl;NEAREST=ENSSSCG00000024389;SIFT=tolerated(1)
rs711081004	2:235015	C	ENSSSCG00000024569	ENSSSCT00000031877	Transcript	missense_variant	1602	1511	504	Q/R	cAg/cGg	-	IMPACT=MODERATE;STRAND=-1;VARIANT_CLASS=SNV;SYMBOL=ANO9;SYMBOL_SOURCE=HGNC;HGNC_ID=HGNC:20679;SOURCE=Ensembl;NEAREST=ENSSSCG00000024389;SIFT=tolerated(0.83)
rs711081004	2:235015	C	ENSSSCG00000024569	ENSSSCT00000032197	Transcript	missense_variant	1641	1610	537	Q/R	cAg/cGg	-	IMPACT=MODERATE;STRAND=-1;VARIANT_CLASS=SNV;SYMBOL=ANO9;SYMBOL_SOURCE=HGNC;HGNC_ID=HGNC:20679;SOURCE=Ensembl;NEAREST=ENSSSCG00000024389;SIFT=tolerated(0.68)
rs711081004	2:235015	C	ENSSSCG00000024569	ENSSSCT00000041910	Transcript	missense_variant	1591	1511	504	Q/R	cAg/cGg	-	IMPACT=MODERATE;STRAND=-1;VARIANT_CLASS=SNV;SYMBOL=ANO9;SYMBOL_SOURCE=HGNC;HGNC_ID=HGNC:20679;SOURCE=Ensembl;NEAREST=ENSSSCG00000024389;SIFT=tolerated(0.78)
rs711081004	2:235015	C	ENSSSCG00000024569	ENSSSCT00000058801	Transcript	missense_variant	1715	1451	484	Q/R	cAg/cGg	-	IMPACT=MODERATE;STRAND=-1;VARIANT_CLASS=SNV;SYMBOL=ANO9;SYMBOL_SOURCE=HGNC;HGNC_ID=HGNC:20679;SOURCE=Ensembl;NEAREST=ENSSSCG00000024389;SIFT=tolerated(0.81)
rs344160896	2:3003711	C	ENSSSCG00000033043	ENSSSCT00000026062	Transcript	missense_variant	3926	3635	1212	R/P	cGc/cCc	-	IMPACT=MODERATE;STRAND=1;VARIANT_CLASS=SNV;SYMBOL=SHANK2;SYMBOL_SOURCE=HGNC;HGNC_ID=HGNC:14295;SOURCE=Ensembl;NEAREST=ENSSSCG00000033043;SIFT=tolerated_low_confidence(0.14)
rs344160896	2:3003711	C	ENSSSCG00000033043	ENSSSCT00000037813	Transcript	missense_variant	3989	3635	1212	R/P	cGc/cCc	-	IMPACT=MODERATE;STRAND=1;VARIANT_CLASS=SNV;SYMBOL=SHANK2;SYMBOL_SOURCE=HGNC;HGNC_ID=HGNC:14295;SOURCE=Ensembl;NEAREST=ENSSSCG00000033043;SIFT=tolerated_low_confidence(0.14)
rs329398735	2:3004117	A	ENSSSCG00000033043	ENSSSCT00000043833	Transcript	missense_variant	2314	2314	772	D/N	Gac/Aac	-	IMPACT=MODERATE;STRAND=1;VARIANT_CLASS=SNV;SYMBOL=SHANK2;SYMBOL_SOURCE=HGNC;HGNC_ID=HGNC:14295;SOURCE=Ensembl;NEAREST=ENSSSCG00000033043;SIFT=deleterious(0.03)
rs329398735	2:3004117	A	ENSSSCG00000033043	ENSSSCT00000051901	Transcript	missense_variant	2056	2056	686	D/N	Gac/Aac	-	IMPACT=MODERATE;STRAND=1;VARIANT_CLASS=SNV;SYMBOL=SHANK2;SYMBOL_SOURCE=HGNC;HGNC_ID=HGNC:14295;SOURCE=Ensembl;NEAREST=ENSSSCG00000033043;SIFT=deleterious(0.03)
rs329398735	2:3004117	A	ENSSSCG00000033043	ENSSSCT00000065006	Transcript	missense_variant	2467	2467	823	D/N	Gac/Aac	-	IMPACT=MODERATE;STRAND=1;VARIANT_CLASS=SNV;SYMBOL=SHANK2;SYMBOL_SOURCE=HGNC;HGNC_ID=HGNC:14295;SOURCE=Ensembl;NEAREST=ENSSSCG00000033043;SIFT=deleterious(0.02)
rs329211007	2:12865995	C	ENSSSCG00000035545	ENSSSCT00000014387	Transcript	missense_variant	897	897	299	D/E	gaT/gaG	-	IMPACT=MODERATE;STRAND=-1;VARIANT_CLASS=SNV;SOURCE=Ensembl;NEAREST=100512703;SIFT=tolerated(1)
rs329211007	2:12865995	C	100512703	XM_003122750.3	Transcript	missense_variant	897	897	299	D/E	gaT/gaG	-	IMPACT=MODERATE;STRAND=-1;VARIANT_CLASS=SNV;SYMBOL=LOC100512703;SYMBOL_SOURCE=EntrezGene;SOURCE=RefSeq;NEAREST=100512703;SIFT=tolerated(1)
rs337284958	7:20395563	G	ENSSSCG00000001101	ENSSSCT00000001197	Transcript	missense_variant	463	230	77	H/R	cAc/cGc	-	IMPACT=MODERATE;STRAND=1;VARIANT_CLASS=SNV;SYMBOL=SCGN;SYMBOL_SOURCE=HGNC;HGNC_ID=HGNC:16941;SOURCE=Ensembl;NEAREST=ENSSSCG00000001101;SIFT=tolerated(1)
._407398	7:24784878	T	ENSSSCG00000001447	ENSSSCT00000001602	Transcript	missense_variant	1018	968	323	Q/L	cAg/cTg	-	IMPACT=MODERATE;STRAND=1;VARIANT_CLASS=SNV;SOURCE=Ensembl;NEAREST=ENSSSCG00000001447;SIFT=tolerated(0.4)
._407398	7:24784878	T	ENSSSCG00000001447	ENSSSCT00000035777	Transcript	missense_variant	1281	968	323	Q/L	cAg/cTg	-	IMPACT=MODERATE;STRAND=1;VARIANT_CLASS=SNV;SOURCE=Ensembl;NEAREST=ENSSSCG00000001447;SIFT=tolerated(0.4)
._407438	7:24787178	A	ENSSSCG00000001447	ENSSSCT00000001602	Transcript	missense_variant	1063	1013	338	R/Q	cGa/cAa	-	IMPACT=MODERATE;STRAND=1;VARIANT_CLASS=SNV;SOURCE=Ensembl;NEAREST=ENSSSCG00000027921;SIFT=tolerated(0.18)
._407438	7:24787178	A	ENSSSCG00000001447	ENSSSCT00000035777	Transcript	missense_variant	1326	1013	338	R/Q	cGa/cAa	-	IMPACT=MODERATE;STRAND=1;VARIANT_CLASS=SNV;SOURCE=Ensembl;NEAREST=ENSSSCG00000027921;SIFT=tolerated(0.18)
rs1108915210	7:24787283	G	ENSSSCG00000001447	ENSSSCT00000001602	Transcript	missense_variant	1168	1118	373	N/S	aAt/aGt	-	IMPACT=MODERATE;STRAND=1;VARIANT_CLASS=SNV;SOURCE=Ensembl;NEAREST=ENSSSCG00000027921;SIFT=tolerated(1)
rs1108915210	7:24787283	G	ENSSSCG00000001447	ENSSSCT00000035777	Transcript	missense_variant	1431	1118	373	N/S	aAt/aGt	-	IMPACT=MODERATE;STRAND=1;VARIANT_CLASS=SNV;SOURCE=Ensembl;NEAREST=ENSSSCG00000027921;SIFT=tolerated(1)
._407444	7:24787349	T	ENSSSCG00000001447	ENSSSCT00000001602	Transcript	missense_variant	1234	1184	395	T/I	aCa/aTa	-	IMPACT=MODERATE;STRAND=1;VARIANT_CLASS=SNV;SOURCE=Ensembl;NEAREST=ENSSSCG00000027921;SIFT=tolerated(0.21)
._407444	7:24787349	T	ENSSSCG00000001447	ENSSSCT00000035777	Transcript	missense_variant	1497	1184	395	T/I	aCa/aTa	-	IMPACT=MODERATE;STRAND=1;VARIANT_CLASS=SNV;SOURCE=Ensembl;NEAREST=ENSSSCG00000027921;SIFT=tolerated(0.21)
rs1109914618	7:24787403	T	ENSSSCG00000001447	ENSSSCT00000001602	Transcript	missense_variant	1288	1238	413	W/L	tGg/tTg	-	IMPACT=MODERATE;STRAND=1;VARIANT_CLASS=SNV;SOURCE=Ensembl;NEAREST=ENSSSCG00000027921;SIFT=tolerated(0.09)
rs1109914618	7:24787403	T	ENSSSCG00000001447	ENSSSCT00000035777	Transcript	missense_variant	1551	1238	413	W/L	tGg/tTg	-	IMPACT=MODERATE;STRAND=1;VARIANT_CLASS=SNV;SOURCE=Ensembl;NEAREST=ENSSSCG00000027921;SIFT=tolerated(0.09)
rs1113355733	7:24787534	A	ENSSSCG00000001447	ENSSSCT00000001602	Transcript	missense_variant	1419	1369	457	V/I	Gtt/Att	-	IMPACT=MODERATE;STRAND=1;VARIANT_CLASS=SNV;SOURCE=Ensembl;NEAREST=ENSSSCG00000027921;SIFT=tolerated(0.43)
rs1113355733	7:24787534	A	ENSSSCG00000001447	ENSSSCT00000035777	Transcript	missense_variant	1682	1369	457	V/I	Gtt/Att	-	IMPACT=MODERATE;STRAND=1;VARIANT_CLASS=SNV;SOURCE=Ensembl;NEAREST=ENSSSCG00000027921;SIFT=tolerated(0.43)
rs1108357984	7:24787546	C	ENSSSCG00000001447	ENSSSCT00000001602	Transcript	missense_variant	1431	1381	461	W/R	Tgg/Cgg	-	IMPACT=MODERATE;STRAND=1;VARIANT_CLASS=SNV;SOURCE=Ensembl;NEAREST=ENSSSCG00000027921;SIFT=tolerated(0.08)
rs1108357984	7:24787546	C	ENSSSCG00000001447	ENSSSCT00000035777	Transcript	missense_variant	1694	1381	461	W/R	Tgg/Cgg	-	IMPACT=MODERATE;STRAND=1;VARIANT_CLASS=SNV;SOURCE=Ensembl;NEAREST=ENSSSCG00000027921;SIFT=tolerated(0.08)
rs1109305717	7:24787556	G	ENSSSCG00000001447	ENSSSCT00000001602	Transcript	missense_variant	1441	1391	464	K/R	aAg/aGg	-	IMPACT=MODERATE;STRAND=1;VARIANT_CLASS=SNV;SOURCE=Ensembl;NEAREST=ENSSSCG00000027921;SIFT=tolerated(0.07)
rs1109305717	7:24787556	G	ENSSSCG00000001447	ENSSSCT00000035777	Transcript	missense_variant	1704	1391	464	K/R	aAg/aGg	-	IMPACT=MODERATE;STRAND=1;VARIANT_CLASS=SNV;SOURCE=Ensembl;NEAREST=ENSSSCG00000027921;SIFT=tolerated(0.07)
rs1107861794	7:24787609	A	ENSSSCG00000001447	ENSSSCT00000001602	Transcript	missense_variant	1494	1444	482	G/R	Gga/Aga	-	IMPACT=MODERATE;STRAND=1;VARIANT_CLASS=SNV;SOURCE=Ensembl;NEAREST=ENSSSCG00000027921;SIFT=tolerated(0.8)
rs1107861794	7:24787609	A	ENSSSCG00000001447	ENSSSCT00000035777	Transcript	missense_variant	1757	1444	482	G/R	Gga/Aga	-	IMPACT=MODERATE;STRAND=1;VARIANT_CLASS=SNV;SOURCE=Ensembl;NEAREST=ENSSSCG00000027921;SIFT=tolerated(0.8)
rs1109559664	7:24787618	G	ENSSSCG00000001447	ENSSSCT00000001602	Transcript	missense_variant	1503	1453	485	I/V	Atc/Gtc	-	IMPACT=MODERATE;STRAND=1;VARIANT_CLASS=SNV;SOURCE=Ensembl;NEAREST=ENSSSCG00000027921;SIFT=deleterious(0.02)
rs1109559664	7:24787618	G	ENSSSCG00000001447	ENSSSCT00000035777	Transcript	missense_variant	1766	1453	485	I/V	Atc/Gtc	-	IMPACT=MODERATE;STRAND=1;VARIANT_CLASS=SNV;SOURCE=Ensembl;NEAREST=ENSSSCG00000027921;SIFT=deleterious(0.02)
rs1113976701	7:24787720	C	ENSSSCG00000001447	ENSSSCT00000001602	Transcript	missense_variant	1605	1555	519	S/P	Tca/Cca	-	IMPACT=MODERATE;STRAND=1;VARIANT_CLASS=SNV;SOURCE=Ensembl;NEAREST=ENSSSCG00000027921;SIFT=tolerated(0.97)
rs1113976701	7:24787720	C	ENSSSCG00000001447	ENSSSCT00000035777	Transcript	missense_variant	1868	1555	519	S/P	Tca/Cca	-	IMPACT=MODERATE;STRAND=1;VARIANT_CLASS=SNV;SOURCE=Ensembl;NEAREST=ENSSSCG00000027921;SIFT=tolerated(0.97)
rs1109931373	7:24792634	C	ENSSSCG00000025071	ENSSSCT00000001605	Transcript	missense_variant	2238	1451	484	Y/C	tAt/tGt	-	IMPACT=MODERATE;STRAND=-1;VARIANT_CLASS=SNV;SYMBOL=BTNL2;SYMBOL_SOURCE=HGNC;HGNC_ID=HGNC:1142;SOURCE=Ensembl;NEAREST=ENSSSCG00000027921;SIFT=tolerated(0.18)
rs1109931373	7:24792634	C	100158014	XM_003482157.3	Transcript	missense_variant	1931	1451	484	Y/C	tAt/tGt	-	IMPACT=MODERATE;STRAND=-1;VARIANT_CLASS=SNV;SYMBOL=BTNL2;SYMBOL_SOURCE=EntrezGene;HGNC_ID=HGNC:1142;SOURCE=RefSeq;NEAREST=ENSSSCG00000027921;SIFT=tolerated(0.18)
rs1109931373	7:24792634	C	100158014	XM_013977699.2	Transcript	missense_variant	1871	1451	484	Y/C	tAt/tGt	-	IMPACT=MODERATE;STRAND=-1;VARIANT_CLASS=SNV;SYMBOL=BTNL2;SYMBOL_SOURCE=EntrezGene;HGNC_ID=HGNC:1142;SOURCE=RefSeq;NEAREST=ENSSSCG00000027921;SIFT=tolerated(0.18)
rs1109931373	7:24792634	C	100158014	XM_013977700.2	Transcript	missense_variant	1907	1451	484	Y/C	tAt/tGt	-	IMPACT=MODERATE;STRAND=-1;VARIANT_CLASS=SNV;SYMBOL=BTNL2;SYMBOL_SOURCE=EntrezGene;HGNC_ID=HGNC:1142;SOURCE=RefSeq;NEAREST=ENSSSCG00000027921;SIFT=tolerated(0.18)
rs1109931373	7:24792634	C	100158014	XM_013977701.2	Transcript	missense_variant	1877	1451	484	Y/C	tAt/tGt	-	IMPACT=MODERATE;STRAND=-1;VARIANT_CLASS=SNV;SYMBOL=BTNL2;SYMBOL_SOURCE=EntrezGene;HGNC_ID=HGNC:1142;SOURCE=RefSeq;NEAREST=ENSSSCG00000027921;SIFT=tolerated(0.18)
rs1109931373	7:24792634	C	100158014	XM_021098499.1	Transcript	missense_variant	1817	1451	484	Y/C	tAt/tGt	-	IMPACT=MODERATE;STRAND=-1;VARIANT_CLASS=SNV;SYMBOL=BTNL2;SYMBOL_SOURCE=EntrezGene;HGNC_ID=HGNC:1142;SOURCE=RefSeq;NEAREST=ENSSSCG00000027921;SIFT=tolerated(0.18)
rs1109931373	7:24792634	C	100158014	XM_021098500.1	Transcript	missense_variant	1853	1451	484	Y/C	tAt/tGt	-	IMPACT=MODERATE;STRAND=-1;VARIANT_CLASS=SNV;SYMBOL=BTNL2;SYMBOL_SOURCE=EntrezGene;HGNC_ID=HGNC:1142;SOURCE=RefSeq;NEAREST=ENSSSCG00000027921;SIFT=tolerated(0.18)
._407673	7:24801678	C	ENSSSCG00000025071	ENSSSCT00000001605	Transcript	missense_variant	1400	613	205	M/V	Atg/Gtg	-	IMPACT=MODERATE;STRAND=-1;VARIANT_CLASS=SNV;SYMBOL=BTNL2;SYMBOL_SOURCE=HGNC;HGNC_ID=HGNC:1142;SOURCE=Ensembl;NEAREST=100158014;SIFT=tolerated(0.21)
._407673	7:24801678	C	100158014	XM_003482157.3	Transcript	missense_variant	1093	613	205	M/V	Atg/Gtg	-	IMPACT=MODERATE;STRAND=-1;VARIANT_CLASS=SNV;SYMBOL=BTNL2;SYMBOL_SOURCE=EntrezGene;HGNC_ID=HGNC:1142;SOURCE=RefSeq;NEAREST=100158014;SIFT=tolerated(0.21)
._407673	7:24801678	C	100158014	XM_013977699.2	Transcript	missense_variant	1033	613	205	M/V	Atg/Gtg	-	IMPACT=MODERATE;STRAND=-1;VARIANT_CLASS=SNV;SYMBOL=BTNL2;SYMBOL_SOURCE=EntrezGene;HGNC_ID=HGNC:1142;SOURCE=RefSeq;NEAREST=100158014;SIFT=tolerated(0.21)
._407673	7:24801678	C	100158014	XM_013977700.2	Transcript	missense_variant	1069	613	205	M/V	Atg/Gtg	-	IMPACT=MODERATE;STRAND=-1;VARIANT_CLASS=SNV;SYMBOL=BTNL2;SYMBOL_SOURCE=EntrezGene;HGNC_ID=HGNC:1142;SOURCE=RefSeq;NEAREST=100158014;SIFT=tolerated(0.21)
._407673	7:24801678	C	100158014	XM_013977701.2	Transcript	missense_variant	1039	613	205	M/V	Atg/Gtg	-	IMPACT=MODERATE;STRAND=-1;VARIANT_CLASS=SNV;SYMBOL=BTNL2;SYMBOL_SOURCE=EntrezGene;HGNC_ID=HGNC:1142;SOURCE=RefSeq;NEAREST=100158014;SIFT=tolerated(0.21)
._407673	7:24801678	C	100158014	XM_021098499.1	Transcript	missense_variant	979	613	205	M/V	Atg/Gtg	-	IMPACT=MODERATE;STRAND=-1;VARIANT_CLASS=SNV;SYMBOL=BTNL2;SYMBOL_SOURCE=EntrezGene;HGNC_ID=HGNC:1142;SOURCE=RefSeq;NEAREST=100158014;SIFT=tolerated(0.21)
._407673	7:24801678	C	100158014	XM_021098500.1	Transcript	missense_variant	1015	613	205	M/V	Atg/Gtg	-	IMPACT=MODERATE;STRAND=-1;VARIANT_CLASS=SNV;SYMBOL=BTNL2;SYMBOL_SOURCE=EntrezGene;HGNC_ID=HGNC:1142;SOURCE=RefSeq;NEAREST=100158014;SIFT=tolerated(0.21)
rs322486789	7:28780998	T	ENSSSCG00000001498	ENSSSCT00000001670	Transcript	missense_variant	1170	815	272	I/N	aTt/aAt	-	IMPACT=MODERATE;STRAND=-1;VARIANT_CLASS=SNV;SYMBOL=BEND6;SYMBOL_SOURCE=HGNC;HGNC_ID=HGNC:20871;SOURCE=Ensembl;NEAREST=ENSSSCG00000001497;SIFT=tolerated_low_confidence(0.74)
rs322486789	7:28780998	T	ENSSSCG00000001498	ENSSSCT00000053774	Transcript	missense_variant	847	815	272	I/N	aTt/aAt	-	IMPACT=MODERATE;STRAND=-1;VARIANT_CLASS=SNV;SYMBOL=BEND6;SYMBOL_SOURCE=HGNC;HGNC_ID=HGNC:20871;SOURCE=Ensembl;NEAREST=ENSSSCG00000001497;SIFT=tolerated_low_confidence(0.74)
rs322486789	7:28780998	T	ENSSSCG00000001498	ENSSSCT00000061050	Transcript	missense_variant	847	815	272	I/N	aTt/aAt	-	IMPACT=MODERATE;STRAND=-1;VARIANT_CLASS=SNV;SYMBOL=BEND6;SYMBOL_SOURCE=HGNC;HGNC_ID=HGNC:20871;SOURCE=Ensembl;NEAREST=ENSSSCG00000001497;SIFT=tolerated_low_confidence(0.74)
rs322486789	7:28780998	T	100153820	XM_001925201.6	Transcript	missense_variant	1150	815	272	I/N	aTt/aAt	-	IMPACT=MODERATE;STRAND=-1;VARIANT_CLASS=SNV;SYMBOL=BEND6;SYMBOL_SOURCE=EntrezGene;HGNC_ID=HGNC:20871;SOURCE=RefSeq;NEAREST=ENSSSCG00000001497;SIFT=tolerated_low_confidence(0.74)
rs322486789	7:28780998	T	100153820	XM_013977762.2	Transcript	missense_variant	1126	815	272	I/N	aTt/aAt	-	IMPACT=MODERATE;STRAND=-1;VARIANT_CLASS=SNV;SYMBOL=BEND6;SYMBOL_SOURCE=EntrezGene;HGNC_ID=HGNC:20871;SOURCE=RefSeq;NEAREST=ENSSSCG00000001497;SIFT=tolerated_low_confidence(0.74)
rs332109593	7:32578712	C	ENSSSCG00000035341	ENSSSCT00000050587	Transcript	missense_variant	1190	1031	344	I/T	aTc/aCc	-	IMPACT=MODERATE;STRAND=1;VARIANT_CLASS=SNV;SYMBOL=C6orf89;SYMBOL_SOURCE=HGNC;HGNC_ID=HGNC:21114;SOURCE=Ensembl;NEAREST=100156227;SIFT=tolerated(1)
rs332109593	7:32578712	C	ENSSSCG00000035341	ENSSSCT00000059917	Transcript	missense_variant	1103	1052	351	I/T	aTc/aCc	-	IMPACT=MODERATE;STRAND=1;VARIANT_CLASS=SNV;SYMBOL=C6orf89;SYMBOL_SOURCE=HGNC;HGNC_ID=HGNC:21114;SOURCE=Ensembl;NEAREST=100156227;SIFT=tolerated(1)
rs332109593	7:32578712	C	100156227	XM_013977868.2	Transcript	missense_variant	1465	1031	344	I/T	aTc/aCc	-	IMPACT=MODERATE;STRAND=1;VARIANT_CLASS=SNV;SYMBOL=C7H6orf89;SYMBOL_SOURCE=EntrezGene;SOURCE=RefSeq;NEAREST=100156227;SIFT=tolerated(1)
rs332109593	7:32578712	C	100156227	XM_021098652.1	Transcript	missense_variant	1735	1031	344	I/T	aTc/aCc	-	IMPACT=MODERATE;STRAND=1;VARIANT_CLASS=SNV;SYMBOL=C7H6orf89;SYMBOL_SOURCE=EntrezGene;SOURCE=RefSeq;NEAREST=100156227;SIFT=tolerated(1)
rs332109593	7:32578712	C	100156227	XM_021098653.1	Transcript	missense_variant	1056	1031	344	I/T	aTc/aCc	-	IMPACT=MODERATE;STRAND=1;VARIANT_CLASS=SNV;SYMBOL=C7H6orf89;SYMBOL_SOURCE=EntrezGene;SOURCE=RefSeq;NEAREST=100156227;SIFT=tolerated(1)
rs80889625	7:36442289	G	ENSSSCG00000001612	ENSSSCT00000001792	Transcript	missense_variant	1475	1475	492	L/R	cTg/cGg	-	IMPACT=MODERATE;STRAND=1;VARIANT_CLASS=SNV;SOURCE=Ensembl;NEAREST=ENSSSCG00000001612;SIFT=tolerated(0.05)
rs327776362	7:36444970	A	ENSSSCG00000001612	ENSSSCT00000001792	Transcript	missense_variant	1841	1841	614	C/Y	tGt/tAt	-	IMPACT=MODERATE;STRAND=1;VARIANT_CLASS=SNV;SOURCE=Ensembl;NEAREST=ENSSSCG00000001612;SIFT=tolerated(1)
rs327776362	7:36444970	A	ENSSSCG00000001612	ENSSSCT00000027428	Transcript	missense_variant	4217	1715	572	C/Y	tGt/tAt	-	IMPACT=MODERATE;STRAND=1;VARIANT_CLASS=SNV;SOURCE=Ensembl;NEAREST=ENSSSCG00000001612;SIFT=tolerated(1)
rs341855371	7:47907548	G	ENSSSCG00000027477	ENSSSCT00000001964	Transcript	missense_variant	1458	1345	449	M/V	Atg/Gtg	-	IMPACT=MODERATE;STRAND=1;VARIANT_CLASS=SNV;SYMBOL=TBC1D2B;SYMBOL_SOURCE=HGNC;HGNC_ID=HGNC:29183;SOURCE=Ensembl;NEAREST=100156840;SIFT=tolerated(0.42)
rs341855371	7:47907548	G	ENSSSCG00000027477	ENSSSCT00000027095	Transcript	missense_variant	1691	1270	424	M/V	Atg/Gtg	-	IMPACT=MODERATE;STRAND=1;VARIANT_CLASS=SNV;SYMBOL=TBC1D2B;SYMBOL_SOURCE=HGNC;HGNC_ID=HGNC:29183;SOURCE=Ensembl;NEAREST=100156840;SIFT=tolerated(0.47)
rs80819601	7:48431793	A	ENSSSCG00000001773	ENSSSCT00000001988	Transcript	missense_variant	158	31	11	A/T	Gca/Aca	-	IMPACT=MODERATE;STRAND=1;VARIANT_CLASS=SNV;SYMBOL=TMED3;SYMBOL_SOURCE=HGNC;HGNC_ID=HGNC:28889;SOURCE=Ensembl;NEAREST=ENSSSCG00000001773;SIFT=tolerated(0.57)

## Sheet: MFR
rs81280681	1:254056567	C	ENSSSCG00000005479	ENSSSCT00000006025	Transcript	missense_variant	925	743	248	L/S	tTa/tCa	-	IMPACT=MODERATE;STRAND=1;VARIANT_CLASS=SNV;SOURCE=Ensembl;NEAREST=100517630;SIFT=deleterious(0.04)
rs81280681	1:254056567	C	100517630	XM_021067775.1	Transcript	missense_variant	1058	743	248	L/S	tTa/tCa	-	IMPACT=MODERATE;STRAND=1;VARIANT_CLASS=SNV;SYMBOL=C1H9orf43;SYMBOL_SOURCE=EntrezGene;SOURCE=RefSeq;NEAREST=100517630;SIFT=deleterious(0.04)
rs80894552	1:258052336	A	ENSSSCG00000005503	ENSSSCT00000006051	Transcript	missense_variant	1450	1027	343	Q/K	Caa/Aaa	-	IMPACT=MODERATE;STRAND=1;VARIANT_CLASS=SNV;SYMBOL=TLR4;SYMBOL_SOURCE=EntrezGene;SOURCE=Ensembl;NEAREST=ENSSSCG00000005503;SIFT=tolerated(1)
rs330023511	18:32034249	T	ENSSSCG00000016640	ENSSSCT00000018118	Transcript	missense_variant	1965	1873	625	H/Y	Cat/Tat	-	IMPACT=MODERATE;STRAND=1;VARIANT_CLASS=SNV;SYMBOL=PPP1R3A;SYMBOL_SOURCE=HGNC;HGNC_ID=HGNC:9291;SOURCE=Ensembl;NEAREST=100518588;SIFT=tolerated(1)
rs330023511	18:32034249	T	100518588	XM_003360157.4	Transcript	missense_variant	1932	1873	625	H/Y	Cat/Tat	-	IMPACT=MODERATE;STRAND=1;VARIANT_CLASS=SNV;SYMBOL=PPP1R3A;SYMBOL_SOURCE=EntrezGene;HGNC_ID=HGNC:9291;SOURCE=RefSeq;NEAREST=100518588;SIFT=tolerated(1)
rs81216451	18:32035326	C	ENSSSCG00000016640	ENSSSCT00000018118	Transcript	missense_variant	3042	2950	984	W/R	Tgg/Cgg	-	IMPACT=MODERATE;STRAND=1;VARIANT_CLASS=SNV;SYMBOL=PPP1R3A;SYMBOL_SOURCE=HGNC;HGNC_ID=HGNC:9291;SOURCE=Ensembl;NEAREST=100518588;SIFT=tolerated(1)
rs81216451	18:32035326	C	100518588	XM_003360157.4	Transcript	missense_variant	3009	2950	984	W/R	Tgg/Cgg	-	IMPACT=MODERATE;STRAND=1;VARIANT_CLASS=SNV;SYMBOL=PPP1R3A;SYMBOL_SOURCE=EntrezGene;HGNC_ID=HGNC:9291;SOURCE=RefSeq;NEAREST=100518588;SIFT=tolerated(1)
rs325261312	18:32035393	T	ENSSSCG00000016640	ENSSSCT00000018118	Transcript	missense_variant	3109	3017	1006	P/L	cCg/cTg	-	IMPACT=MODERATE;STRAND=1;VARIANT_CLASS=SNV;SYMBOL=PPP1R3A;SYMBOL_SOURCE=HGNC;HGNC_ID=HGNC:9291;SOURCE=Ensembl;NEAREST=100518588;SIFT=deleterious(0.01)
rs325261312	18:32035393	T	100518588	XM_003360157.4	Transcript	missense_variant	3076	3017	1006	P/L	cCg/cTg	-	IMPACT=MODERATE;STRAND=1;VARIANT_CLASS=SNV;SYMBOL=PPP1R3A;SYMBOL_SOURCE=EntrezGene;HGNC_ID=HGNC:9291;SOURCE=RefSeq;NEAREST=100518588;SIFT=deleterious(0.01)
rs711081004	2:235015	C	ENSSSCG00000024569	ENSSSCT00000029231	Transcript	missense_variant	1428	1349	450	Q/R	cAg/cGg	-	IMPACT=MODERATE;STRAND=-1;VARIANT_CLASS=SNV;SYMBOL=ANO9;SYMBOL_SOURCE=HGNC;HGNC_ID=HGNC:20679;SOURCE=Ensembl;NEAREST=ENSSSCG00000024389;SIFT=tolerated(1)
rs711081004	2:235015	C	ENSSSCG00000024569	ENSSSCT00000031877	Transcript	missense_variant	1602	1511	504	Q/R	cAg/cGg	-	IMPACT=MODERATE;STRAND=-1;VARIANT_CLASS=SNV;SYMBOL=ANO9;SYMBOL_SOURCE=HGNC;HGNC_ID=HGNC:20679;SOURCE=Ensembl;NEAREST=ENSSSCG00000024389;SIFT=tolerated(0.83)
rs711081004	2:235015	C	ENSSSCG00000024569	ENSSSCT00000032197	Transcript	missense_variant	1641	1610	537	Q/R	cAg/cGg	-	IMPACT=MODERATE;STRAND=-1;VARIANT_CLASS=SNV;SYMBOL=ANO9;SYMBOL_SOURCE=HGNC;HGNC_ID=HGNC:20679;SOURCE=Ensembl;NEAREST=ENSSSCG00000024389;SIFT=tolerated(0.68)
rs711081004	2:235015	C	ENSSSCG00000024569	ENSSSCT00000041910	Transcript	missense_variant	1591	1511	504	Q/R	cAg/cGg	-	IMPACT=MODERATE;STRAND=-1;VARIANT_CLASS=SNV;SYMBOL=ANO9;SYMBOL_SOURCE=HGNC;HGNC_ID=HGNC:20679;SOURCE=Ensembl;NEAREST=ENSSSCG00000024389;SIFT=tolerated(0.78)
rs711081004	2:235015	C	ENSSSCG00000024569	ENSSSCT00000058801	Transcript	missense_variant	1715	1451	484	Q/R	cAg/cGg	-	IMPACT=MODERATE;STRAND=-1;VARIANT_CLASS=SNV;SYMBOL=ANO9;SYMBOL_SOURCE=HGNC;HGNC_ID=HGNC:20679;SOURCE=Ensembl;NEAREST=ENSSSCG00000024389;SIFT=tolerated(0.81)
rs344160896	2:3003711	C	ENSSSCG00000033043	ENSSSCT00000026062	Transcript	missense_variant	3926	3635	1212	R/P	cGc/cCc	-	IMPACT=MODERATE;STRAND=1;VARIANT_CLASS=SNV;SYMBOL=SHANK2;SYMBOL_SOURCE=HGNC;HGNC_ID=HGNC:14295;SOURCE=Ensembl;NEAREST=ENSSSCG00000033043;SIFT=tolerated_low_confidence(0.14)
rs344160896	2:3003711	C	ENSSSCG00000033043	ENSSSCT00000037813	Transcript	missense_variant	3989	3635	1212	R/P	cGc/cCc	-	IMPACT=MODERATE;STRAND=1;VARIANT_CLASS=SNV;SYMBOL=SHANK2;SYMBOL_SOURCE=HGNC;HGNC_ID=HGNC:14295;SOURCE=Ensembl;NEAREST=ENSSSCG00000033043;SIFT=tolerated_low_confidence(0.14)
rs329398735	2:3004117	A	ENSSSCG00000033043	ENSSSCT00000043833	Transcript	missense_variant	2314	2314	772	D/N	Gac/Aac	-	IMPACT=MODERATE;STRAND=1;VARIANT_CLASS=SNV;SYMBOL=SHANK2;SYMBOL_SOURCE=HGNC;HGNC_ID=HGNC:14295;SOURCE=Ensembl;NEAREST=ENSSSCG00000033043;SIFT=deleterious(0.03)
rs329398735	2:3004117	A	ENSSSCG00000033043	ENSSSCT00000051901	Transcript	missense_variant	2056	2056	686	D/N	Gac/Aac	-	IMPACT=MODERATE;STRAND=1;VARIANT_CLASS=SNV;SYMBOL=SHANK2;SYMBOL_SOURCE=HGNC;HGNC_ID=HGNC:14295;SOURCE=Ensembl;NEAREST=ENSSSCG00000033043;SIFT=deleterious(0.03)
rs329398735	2:3004117	A	ENSSSCG00000033043	ENSSSCT00000065006	Transcript	missense_variant	2467	2467	823	D/N	Gac/Aac	-	IMPACT=MODERATE;STRAND=1;VARIANT_CLASS=SNV;SYMBOL=SHANK2;SYMBOL_SOURCE=HGNC;HGNC_ID=HGNC:14295;SOURCE=Ensembl;NEAREST=ENSSSCG00000033043;SIFT=deleterious(0.02)
rs55619454	2:11646163	G	ENSSSCG00000039252	ENSSSCT00000054333	Transcript	missense_variant	1744	1291	431	I/V	Att/Gtt	-	IMPACT=MODERATE;STRAND=1;VARIANT_CLASS=SNV;SYMBOL=TCN1;SYMBOL_SOURCE=HGNC;HGNC_ID=HGNC:11652;SOURCE=Ensembl;NEAREST=102158414;SIFT=tolerated_low_confidence(1)
rs336526347	2:11666501	A	ENSSSCG00000013117	ENSSSCT00000014337	Transcript	missense_variant	949	740	247	R/Q	cGa/cAa	-	IMPACT=MODERATE;STRAND=1;VARIANT_CLASS=SNV;SYMBOL=GIF;SYMBOL_SOURCE=HGNC;HGNC_ID=HGNC:4268;SOURCE=Ensembl;NEAREST=100514273;SIFT=tolerated(0.74)
rs336526347	2:11666501	A	ENSSSCG00000013117	ENSSSCT00000052911	Transcript	missense_variant	808	599	200	R/Q	cGa/cAa	-	IMPACT=MODERATE;STRAND=1;VARIANT_CLASS=SNV;SYMBOL=GIF;SYMBOL_SOURCE=HGNC;HGNC_ID=HGNC:4268;SOURCE=Ensembl;NEAREST=100514273;SIFT=tolerated(0.49)
rs336526347	2:11666501	A	100514273	XM_003122682.3	Transcript	missense_variant	810	740	247	R/Q	cGa/cAa	-	IMPACT=MODERATE;STRAND=1;VARIANT_CLASS=SNV;SYMBOL=GIF;SYMBOL_SOURCE=EntrezGene;HGNC_ID=HGNC:4268;SOURCE=RefSeq;NEAREST=100514273;SIFT=tolerated(0.74)
rs321750978	2:12493518	T	ENSSSCG00000013155	ENSSSCT00000041738	Transcript	missense_variant	253	253	85	V/I	Gtt/Att	-	IMPACT=MODERATE;STRAND=-1;VARIANT_CLASS=SNV;SOURCE=Ensembl;NEAREST=ENSSSCG00000013155;SIFT=tolerated(0.28)
rs81323907	2:12604501	C	ENSSSCG00000013157	ENSSSCT00000014377	Transcript	missense_variant	590	590	197	V/A	gTc/gCc	-	IMPACT=MODERATE;STRAND=1;VARIANT_CLASS=SNV;SYMBOL=OR5B21;SYMBOL_SOURCE=HGNC;HGNC_ID=HGNC:19616;SOURCE=Ensembl;NEAREST=106509345;SIFT=deleterious_low_confidence(0.02)
rs343160481	2:12647443	T	ENSSSCG00000036016	ENSSSCT00000059434	Transcript	missense_variant	323	323	108	A/V	gCg/gTg	-	IMPACT=MODERATE;STRAND=1;VARIANT_CLASS=SNV;SOURCE=Ensembl;NEAREST=100623017;SIFT=tolerated_low_confidence(1)
rs333960448	2:12653784	A	ENSSSCG00000039789	ENSSSCT00000063477	Transcript	missense_variant	938	938	313	T/I	aCc/aTc	-	IMPACT=MODERATE;STRAND=-1;VARIANT_CLASS=SNV;SOURCE=Ensembl;NEAREST=106509346;SIFT=tolerated_low_confidence(0.52)
rs333960448	2:12653784	A	106509346	XM_013994291.1	Transcript	missense_variant	938	938	313	T/I	aCc/aTc	-	IMPACT=MODERATE;STRAND=-1;VARIANT_CLASS=SNV;SYMBOL=LOC106509346;SYMBOL_SOURCE=EntrezGene;SOURCE=RefSeq;NEAREST=106509346;SIFT=tolerated_low_confidence(0.52)
rs338876883	2:12653933	T	ENSSSCG00000039789	ENSSSCT00000063477	Transcript	missense_variant	789	789	263	S/R	agC/agA	-	IMPACT=MODERATE;STRAND=-1;VARIANT_CLASS=SNV;SOURCE=Ensembl;NEAREST=106509346;SIFT=deleterious_low_confidence(0.05)
rs338876883	2:12653933	T	106509346	XM_013994291.1	Transcript	missense_variant	789	789	263	S/R	agC/agA	-	IMPACT=MODERATE;STRAND=-1;VARIANT_CLASS=SNV;SYMBOL=LOC106509346;SYMBOL_SOURCE=EntrezGene;SOURCE=RefSeq;NEAREST=106509346;SIFT=deleterious_low_confidence(0.05)
rs701932291	2:12843678	A	ENSSSCG00000037952	ENSSSCT00000014385	Transcript	missense_variant	277	277	93	Q/K	Cag/Aag	-	IMPACT=MODERATE;STRAND=1;VARIANT_CLASS=SNV;SYMBOL=OR10Q1;SYMBOL_SOURCE=HGNC;HGNC_ID=HGNC:15134;SOURCE=Ensembl;NEAREST=ENSSSCG00000037952;SIFT=tolerated(0.43)
rs701932291	2:12843678	A	100512331	XM_021085038.1	Transcript	missense_variant	277	277	93	Q/K	Cag/Aag	-	IMPACT=MODERATE;STRAND=1;VARIANT_CLASS=SNV;SYMBOL=LOC100512331;SYMBOL_SOURCE=EntrezGene;SOURCE=RefSeq;NEAREST=ENSSSCG00000037952;SIFT=tolerated(0.43)
rs329211007	2:12865995	C	ENSSSCG00000035545	ENSSSCT00000014387	Transcript	missense_variant	897	897	299	D/E	gaT/gaG	-	IMPACT=MODERATE;STRAND=-1;VARIANT_CLASS=SNV;SOURCE=Ensembl;NEAREST=100512703;SIFT=tolerated(1)
rs329211007	2:12865995	C	100512703	XM_003122750.3	Transcript	missense_variant	897	897	299	D/E	gaT/gaG	-	IMPACT=MODERATE;STRAND=-1;VARIANT_CLASS=SNV;SYMBOL=LOC100512703;SYMBOL_SOURCE=EntrezGene;SOURCE=RefSeq;NEAREST=100512703;SIFT=tolerated(1)
rs321538696	2:12866311	A	ENSSSCG00000035545	ENSSSCT00000014387	Transcript	missense_variant	581	581	194	T/I	aCc/aTc	-	IMPACT=MODERATE;STRAND=-1;VARIANT_CLASS=SNV;SOURCE=Ensembl;NEAREST=100512703;SIFT=tolerated(1)
rs321538696	2:12866311	A	100512703	XM_003122750.3	Transcript	missense_variant	581	581	194	T/I	aCc/aTc	-	IMPACT=MODERATE;STRAND=-1;VARIANT_CLASS=SNV;SYMBOL=LOC100512703;SYMBOL_SOURCE=EntrezGene;SOURCE=RefSeq;NEAREST=100512703;SIFT=tolerated(1)
rs338302126	4:68889404	A	ENSSSCG00000006218	ENSSSCT00000006814	Transcript	missense_variant	1203	847	283	A/T	Gcc/Acc	-	IMPACT=MODERATE;STRAND=1;VARIANT_CLASS=SNV;SYMBOL=PDE7A;SYMBOL_SOURCE=HGNC;HGNC_ID=HGNC:8791;SOURCE=Ensembl;NEAREST=ENSSSCG00000006218;SIFT=tolerated(0.34)
rs338302126	4:68889404	A	ENSSSCG00000006218	ENSSSCT00000058082	Transcript	missense_variant	1567	1039	347	A/T	Gcc/Acc	-	IMPACT=MODERATE;STRAND=1;VARIANT_CLASS=SNV;SYMBOL=PDE7A;SYMBOL_SOURCE=HGNC;HGNC_ID=HGNC:8791;SOURCE=Ensembl;NEAREST=ENSSSCG00000006218;SIFT=tolerated(0.42)
rs338302126	4:68889404	A	100127143	XM_021089289.1	Transcript	missense_variant	3193	1039	347	A/T	Gcc/Acc	-	IMPACT=MODERATE;STRAND=1;VARIANT_CLASS=SNV;SYMBOL=PDE7A;SYMBOL_SOURCE=EntrezGene;HGNC_ID=HGNC:8791;SOURCE=RefSeq;NEAREST=ENSSSCG00000006218;SIFT=tolerated(0.42)

## Sheet: CRCL
rs337284958	7:20395563	G	ENSSSCG00000001101	ENSSSCT00000001197	Transcript	missense_variant	463	230	77	H/R	cAc/cGc	-	IMPACT=MODERATE;STRAND=1;VARIANT_CLASS=SNV;SYMBOL=SCGN;SYMBOL_SOURCE=HGNC;HGNC_ID=HGNC:16941;SOURCE=Ensembl;NEAREST=ENSSSCG00000001101;SIFT=tolerated(1)
rs336119001	7:23958362	T	ENSSSCG00000001418	ENSSSCT00000001555	Transcript	missense_variant	298	158	53	S/N	aGt/aAt	-	IMPACT=MODERATE;STRAND=-1;VARIANT_CLASS=SNV;SYMBOL=NEU1;SYMBOL_SOURCE=EntrezGene;SOURCE=Ensembl;NEAREST=ENSSSCG00000001418;SIFT=tolerated(0.17)
rs80832458	7:24073214	G	ENSSSCG00000001427	ENSSSCT00000001570	Transcript	missense_variant	2014	2014	672	T/A	Aca/Gca	-	IMPACT=MODERATE;STRAND=1;VARIANT_CLASS=SNV;SYMBOL=C4A;SYMBOL_SOURCE=EntrezGene;SOURCE=Ensembl;NEAREST=ENSSSCG00000001427;SIFT=tolerated(0.43)
rs330747065	7:24086310	G	ENSSSCG00000001428	ENSSSCT00000001571	Transcript	missense_variant	53	13	5	W/G	Tgg/Ggg	-	IMPACT=MODERATE;STRAND=1;VARIANT_CLASS=SNV;SYMBOL=CYP21A2;SYMBOL_SOURCE=HGNC;HGNC_ID=HGNC:2600;SOURCE=Ensembl;NEAREST=ENSSSCG00000001428;SIFT=tolerated_low_confidence(0.07)
rs324906846	7:24087728	A	ENSSSCG00000001428	ENSSSCT00000001571	Transcript	missense_variant	830	790	264	G/R	Ggg/Agg	-	IMPACT=MODERATE;STRAND=1;VARIANT_CLASS=SNV;SYMBOL=CYP21A2;SYMBOL_SOURCE=HGNC;HGNC_ID=HGNC:2600;SOURCE=Ensembl;NEAREST=ENSSSCG00000001428;SIFT=tolerated(0.54)
rs1108915210	7:24787283	G	ENSSSCG00000001447	ENSSSCT00000001602	Transcript	missense_variant	1168	1118	373	N/S	aAt/aGt	-	IMPACT=MODERATE;STRAND=1;VARIANT_CLASS=SNV;SOURCE=Ensembl;NEAREST=ENSSSCG00000027921;SIFT=tolerated(1)
rs1108915210	7:24787283	G	ENSSSCG00000001447	ENSSSCT00000035777	Transcript	missense_variant	1431	1118	373	N/S	aAt/aGt	-	IMPACT=MODERATE;STRAND=1;VARIANT_CLASS=SNV;SOURCE=Ensembl;NEAREST=ENSSSCG00000027921;SIFT=tolerated(1)
._407444	7:24787349	T	ENSSSCG00000001447	ENSSSCT00000001602	Transcript	missense_variant	1234	1184	395	T/I	aCa/aTa	-	IMPACT=MODERATE;STRAND=1;VARIANT_CLASS=SNV;SOURCE=Ensembl;NEAREST=ENSSSCG00000027921;SIFT=tolerated(0.21)
._407444	7:24787349	T	ENSSSCG00000001447	ENSSSCT00000035777	Transcript	missense_variant	1497	1184	395	T/I	aCa/aTa	-	IMPACT=MODERATE;STRAND=1;VARIANT_CLASS=SNV;SOURCE=Ensembl;NEAREST=ENSSSCG00000027921;SIFT=tolerated(0.21)
rs1109914618	7:24787403	T	ENSSSCG00000001447	ENSSSCT00000001602	Transcript	missense_variant	1288	1238	413	W/L	tGg/tTg	-	IMPACT=MODERATE;STRAND=1;VARIANT_CLASS=SNV;SOURCE=Ensembl;NEAREST=ENSSSCG00000027921;SIFT=tolerated(0.09)
rs1109914618	7:24787403	T	ENSSSCG00000001447	ENSSSCT00000035777	Transcript	missense_variant	1551	1238	413	W/L	tGg/tTg	-	IMPACT=MODERATE;STRAND=1;VARIANT_CLASS=SNV;SOURCE=Ensembl;NEAREST=ENSSSCG00000027921;SIFT=tolerated(0.09)
rs1113355733	7:24787534	A	ENSSSCG00000001447	ENSSSCT00000001602	Transcript	missense_variant	1419	1369	457	V/I	Gtt/Att	-	IMPACT=MODERATE;STRAND=1;VARIANT_CLASS=SNV;SOURCE=Ensembl;NEAREST=ENSSSCG00000027921;SIFT=tolerated(0.43)
rs1113355733	7:24787534	A	ENSSSCG00000001447	ENSSSCT00000035777	Transcript	missense_variant	1682	1369	457	V/I	Gtt/Att	-	IMPACT=MODERATE;STRAND=1;VARIANT_CLASS=SNV;SOURCE=Ensembl;NEAREST=ENSSSCG00000027921;SIFT=tolerated(0.43)
rs1108357984	7:24787546	C	ENSSSCG00000001447	ENSSSCT00000001602	Transcript	missense_variant	1431	1381	461	W/R	Tgg/Cgg	-	IMPACT=MODERATE;STRAND=1;VARIANT_CLASS=SNV;SOURCE=Ensembl;NEAREST=ENSSSCG00000027921;SIFT=tolerated(0.08)
rs1108357984	7:24787546	C	ENSSSCG00000001447	ENSSSCT00000035777	Transcript	missense_variant	1694	1381	461	W/R	Tgg/Cgg	-	IMPACT=MODERATE;STRAND=1;VARIANT_CLASS=SNV;SOURCE=Ensembl;NEAREST=ENSSSCG00000027921;SIFT=tolerated(0.08)
rs1109305717	7:24787556	G	ENSSSCG00000001447	ENSSSCT00000001602	Transcript	missense_variant	1441	1391	464	K/R	aAg/aGg	-	IMPACT=MODERATE;STRAND=1;VARIANT_CLASS=SNV;SOURCE=Ensembl;NEAREST=ENSSSCG00000027921;SIFT=tolerated(0.07)
rs1109305717	7:24787556	G	ENSSSCG00000001447	ENSSSCT00000035777	Transcript	missense_variant	1704	1391	464	K/R	aAg/aGg	-	IMPACT=MODERATE;STRAND=1;VARIANT_CLASS=SNV;SOURCE=Ensembl;NEAREST=ENSSSCG00000027921;SIFT=tolerated(0.07)
rs1107861794	7:24787609	A	ENSSSCG00000001447	ENSSSCT00000001602	Transcript	missense_variant	1494	1444	482	G/R	Gga/Aga	-	IMPACT=MODERATE;STRAND=1;VARIANT_CLASS=SNV;SOURCE=Ensembl;NEAREST=ENSSSCG00000027921;SIFT=tolerated(0.8)
rs1107861794	7:24787609	A	ENSSSCG00000001447	ENSSSCT00000035777	Transcript	missense_variant	1757	1444	482	G/R	Gga/Aga	-	IMPACT=MODERATE;STRAND=1;VARIANT_CLASS=SNV;SOURCE=Ensembl;NEAREST=ENSSSCG00000027921;SIFT=tolerated(0.8)
rs1109559664	7:24787618	G	ENSSSCG00000001447	ENSSSCT00000001602	Transcript	missense_variant	1503	1453	485	I/V	Atc/Gtc	-	IMPACT=MODERATE;STRAND=1;VARIANT_CLASS=SNV;SOURCE=Ensembl;NEAREST=ENSSSCG00000027921;SIFT=deleterious(0.02)
rs1109559664	7:24787618	G	ENSSSCG00000001447	ENSSSCT00000035777	Transcript	missense_variant	1766	1453	485	I/V	Atc/Gtc	-	IMPACT=MODERATE;STRAND=1;VARIANT_CLASS=SNV;SOURCE=Ensembl;NEAREST=ENSSSCG00000027921;SIFT=deleterious(0.02)
rs1113976701	7:24787720	C	ENSSSCG00000001447	ENSSSCT00000001602	Transcript	missense_variant	1605	1555	519	S/P	Tca/Cca	-	IMPACT=MODERATE;STRAND=1;VARIANT_CLASS=SNV;SOURCE=Ensembl;NEAREST=ENSSSCG00000027921;SIFT=tolerated(0.97)
rs1113976701	7:24787720	C	ENSSSCG00000001447	ENSSSCT00000035777	Transcript	missense_variant	1868	1555	519	S/P	Tca/Cca	-	IMPACT=MODERATE;STRAND=1;VARIANT_CLASS=SNV;SOURCE=Ensembl;NEAREST=ENSSSCG00000027921;SIFT=tolerated(0.97)
rs1109931373	7:24792634	C	ENSSSCG00000025071	ENSSSCT00000001605	Transcript	missense_variant	2238	1451	484	Y/C	tAt/tGt	-	IMPACT=MODERATE;STRAND=-1;VARIANT_CLASS=SNV;SYMBOL=BTNL2;SYMBOL_SOURCE=HGNC;HGNC_ID=HGNC:1142;SOURCE=Ensembl;NEAREST=ENSSSCG00000027921;SIFT=tolerated(0.18)
rs1109931373	7:24792634	C	100158014	XM_003482157.3	Transcript	missense_variant	1931	1451	484	Y/C	tAt/tGt	-	IMPACT=MODERATE;STRAND=-1;VARIANT_CLASS=SNV;SYMBOL=BTNL2;SYMBOL_SOURCE=EntrezGene;HGNC_ID=HGNC:1142;SOURCE=RefSeq;NEAREST=ENSSSCG00000027921;SIFT=tolerated(0.18)
rs1109931373	7:24792634	C	100158014	XM_013977699.2	Transcript	missense_variant	1871	1451	484	Y/C	tAt/tGt	-	IMPACT=MODERATE;STRAND=-1;VARIANT_CLASS=SNV;SYMBOL=BTNL2;SYMBOL_SOURCE=EntrezGene;HGNC_ID=HGNC:1142;SOURCE=RefSeq;NEAREST=ENSSSCG00000027921;SIFT=tolerated(0.18)
rs1109931373	7:24792634	C	100158014	XM_013977700.2	Transcript	missense_variant	1907	1451	484	Y/C	tAt/tGt	-	IMPACT=MODERATE;STRAND=-1;VARIANT_CLASS=SNV;SYMBOL=BTNL2;SYMBOL_SOURCE=EntrezGene;HGNC_ID=HGNC:1142;SOURCE=RefSeq;NEAREST=ENSSSCG00000027921;SIFT=tolerated(0.18)
rs1109931373	7:24792634	C	100158014	XM_013977701.2	Transcript	missense_variant	1877	1451	484	Y/C	tAt/tGt	-	IMPACT=MODERATE;STRAND=-1;VARIANT_CLASS=SNV;SYMBOL=BTNL2;SYMBOL_SOURCE=EntrezGene;HGNC_ID=HGNC:1142;SOURCE=RefSeq;NEAREST=ENSSSCG00000027921;SIFT=tolerated(0.18)
rs1109931373	7:24792634	C	100158014	XM_021098499.1	Transcript	missense_variant	1817	1451	484	Y/C	tAt/tGt	-	IMPACT=MODERATE;STRAND=-1;VARIANT_CLASS=SNV;SYMBOL=BTNL2;SYMBOL_SOURCE=EntrezGene;HGNC_ID=HGNC:1142;SOURCE=RefSeq;NEAREST=ENSSSCG00000027921;SIFT=tolerated(0.18)
rs1109931373	7:24792634	C	100158014	XM_021098500.1	Transcript	missense_variant	1853	1451	484	Y/C	tAt/tGt	-	IMPACT=MODERATE;STRAND=-1;VARIANT_CLASS=SNV;SYMBOL=BTNL2;SYMBOL_SOURCE=EntrezGene;HGNC_ID=HGNC:1142;SOURCE=RefSeq;NEAREST=ENSSSCG00000027921;SIFT=tolerated(0.18)
rs322046008	7:24847133	T	ENSSSCG00000031336	ENSSSCT00000001618	Transcript	missense_variant	1123	739	247	R/S	Cgt/Agt	-	IMPACT=MODERATE;STRAND=-1;VARIANT_CLASS=SNV;SOURCE=Ensembl;NEAREST=ENSSSCG00000031336;SIFT=tolerated(0.76)
rs322046008	7:24847133	T	ENSSSCG00000031336	ENSSSCT00000042117	Transcript	missense_variant	749	655	219	R/S	Cgt/Agt	-	IMPACT=MODERATE;STRAND=-1;VARIANT_CLASS=SNV;SOURCE=Ensembl;NEAREST=ENSSSCG00000031336;SIFT=tolerated(0.88)
rs322046008	7:24847133	T	ENSSSCG00000031336	ENSSSCT00000063345	Transcript	missense_variant	833	739	247	R/S	Cgt/Agt	-	IMPACT=MODERATE;STRAND=-1;VARIANT_CLASS=SNV;SOURCE=Ensembl;NEAREST=ENSSSCG00000031336;SIFT=tolerated(0.96)
rs323983846	7:26069234	T	ENSSSCG00000001483	ENSSSCT00000001655	Transcript	missense_variant	741	557	186	S/N	aGt/aAt	-	IMPACT=MODERATE;STRAND=-1;VARIANT_CLASS=SNV;SYMBOL=FAM83B;SYMBOL_SOURCE=HGNC;HGNC_ID=HGNC:21357;SOURCE=Ensembl;NEAREST=ENSSSCG00000001483;SIFT=tolerated(0.69)
rs323983846	7:26069234	T	100155972	XM_001927561.5	Transcript	missense_variant	950	557	186	S/N	aGt/aAt	-	IMPACT=MODERATE;STRAND=-1;VARIANT_CLASS=SNV;SYMBOL=FAM83B;SYMBOL_SOURCE=EntrezGene;HGNC_ID=HGNC:21357;SOURCE=RefSeq;NEAREST=ENSSSCG00000001483;SIFT=tolerated(0.69)
rs80988070	7:32379084	G	ENSSSCG00000001566	ENSSSCT00000001745	Transcript	missense_variant	404	130	44	S/A	Tca/Gca	-	IMPACT=MODERATE;STRAND=1;VARIANT_CLASS=SNV;SYMBOL=RAB44;SYMBOL_SOURCE=HGNC;HGNC_ID=HGNC:21068;SOURCE=Ensembl;NEAREST=100153789;SIFT=tolerated(1)
rs80988070	7:32379084	G	ENSSSCG00000001566	ENSSSCT00000056311	Transcript	missense_variant	404	130	44	S/A	Tca/Gca	-	IMPACT=MODERATE;STRAND=1;VARIANT_CLASS=SNV;SYMBOL=RAB44;SYMBOL_SOURCE=HGNC;HGNC_ID=HGNC:21068;SOURCE=Ensembl;NEAREST=100153789;SIFT=tolerated(1)
rs80988070	7:32379084	G	100153789	XM_005665935.3	Transcript	missense_variant	257	130	44	S/A	Tca/Gca	-	IMPACT=MODERATE;STRAND=1;VARIANT_CLASS=SNV;SYMBOL=RAB44;SYMBOL_SOURCE=EntrezGene;HGNC_ID=HGNC:21068;SOURCE=RefSeq;NEAREST=100153789;SIFT=tolerated(1)
rs342789781	7:32392789	A	ENSSSCG00000001566	ENSSSCT00000001745	Transcript	missense_variant	2471	2197	733	E/K	Gag/Aag	-	IMPACT=MODERATE;STRAND=1;VARIANT_CLASS=SNV;SYMBOL=RAB44;SYMBOL_SOURCE=HGNC;HGNC_ID=HGNC:21068;SOURCE=Ensembl;NEAREST=ENSSSCG00000036130;SIFT=tolerated(0.07)
rs342789781	7:32392789	A	ENSSSCG00000001566	ENSSSCT00000056311	Transcript	missense_variant	2471	2197	733	E/K	Gag/Aag	-	IMPACT=MODERATE;STRAND=1;VARIANT_CLASS=SNV;SYMBOL=RAB44;SYMBOL_SOURCE=HGNC;HGNC_ID=HGNC:21068;SOURCE=Ensembl;NEAREST=ENSSSCG00000036130;SIFT=tolerated(0.07)
rs342789781	7:32392789	A	100153789	XM_005665935.3	Transcript	missense_variant	2324	2197	733	E/K	Gag/Aag	-	IMPACT=MODERATE;STRAND=1;VARIANT_CLASS=SNV;SYMBOL=RAB44;SYMBOL_SOURCE=EntrezGene;HGNC_ID=HGNC:21068;SOURCE=RefSeq;NEAREST=ENSSSCG00000036130;SIFT=tolerated(0.07)
rs327890305	7:32406441	A	ENSSSCG00000036130	ENSSSCT00000056809	Transcript	missense_variant	1007	1007	336	R/Q	cGg/cAg	-	IMPACT=MODERATE;STRAND=1;VARIANT_CLASS=SNV;SOURCE=Ensembl;NEAREST=ENSSSCG00000036130;SIFT=tolerated(0.64)
rs342629127	7:32406524	A	ENSSSCG00000036130	ENSSSCT00000056809	Transcript	missense_variant	1090	1090	364	C/S	Tgt/Agt	-	IMPACT=MODERATE;STRAND=1;VARIANT_CLASS=SNV;SOURCE=Ensembl;NEAREST=ENSSSCG00000036130;SIFT=tolerated_low_confidence(0.96)
rs332508065	7:35311874	C	ENSSSCG00000001596	ENSSSCT00000001776	Transcript	missense_variant	376	34	12	T/A	Act/Gct	-	IMPACT=MODERATE;STRAND=-1;VARIANT_CLASS=SNV;SOURCE=Ensembl;NEAREST=ENSSSCG00000001596;SIFT=tolerated(0.05)
rs80889625	7:36442289	G	ENSSSCG00000001612	ENSSSCT00000001792	Transcript	missense_variant	1475	1475	492	L/R	cTg/cGg	-	IMPACT=MODERATE;STRAND=1;VARIANT_CLASS=SNV;SOURCE=Ensembl;NEAREST=ENSSSCG00000001612;SIFT=tolerated(0.05)
rs327776362	7:36444970	A	ENSSSCG00000001612	ENSSSCT00000001792	Transcript	missense_variant	1841	1841	614	C/Y	tGt/tAt	-	IMPACT=MODERATE;STRAND=1;VARIANT_CLASS=SNV;SOURCE=Ensembl;NEAREST=ENSSSCG00000001612;SIFT=tolerated(1)
rs327776362	7:36444970	A	ENSSSCG00000001612	ENSSSCT00000027428	Transcript	missense_variant	4217	1715	572	C/Y	tGt/tAt	-	IMPACT=MODERATE;STRAND=1;VARIANT_CLASS=SNV;SOURCE=Ensembl;NEAREST=ENSSSCG00000001612;SIFT=tolerated(1)
rs342572060	7:38253828	T	ENSSSCG00000030196	ENSSSCT00000030706	Transcript	missense_variant	5780	4226	1409	A/V	gCc/gTc	-	IMPACT=MODERATE;STRAND=1;VARIANT_CLASS=SNV;SYMBOL=CUL9;SYMBOL_SOURCE=HGNC;HGNC_ID=HGNC:15982;SOURCE=Ensembl;NEAREST=ENSSSCG00000026568;SIFT=deleterious(0.03)
rs342572060	7:38253828	T	ENSSSCG00000030196	ENSSSCT00000059861	Transcript	missense_variant	5561	5561	1854	A/V	gCc/gTc	-	IMPACT=MODERATE;STRAND=1;VARIANT_CLASS=SNV;SYMBOL=CUL9;SYMBOL_SOURCE=HGNC;HGNC_ID=HGNC:15982;SOURCE=Ensembl;NEAREST=ENSSSCG00000026568;SIFT=deleterious(0.02)
rs342572060	7:38253828	T	ENSSSCG00000030196	ENSSSCT00000065918	Transcript	missense_variant	5561	5561	1854	A/V	gCc/gTc	-	IMPACT=MODERATE;STRAND=1;VARIANT_CLASS=SNV;SYMBOL=CUL9;SYMBOL_SOURCE=HGNC;HGNC_ID=HGNC:15982;SOURCE=Ensembl;NEAREST=ENSSSCG00000026568;SIFT=deleterious(0.02)
rs342572060	7:38253828	T	100154751	XM_001929268.6	Transcript	missense_variant	6132	5561	1854	A/V	gCc/gTc	-	IMPACT=MODERATE;STRAND=1;VARIANT_CLASS=SNV;SYMBOL=CUL9;SYMBOL_SOURCE=EntrezGene;HGNC_ID=HGNC:15982;SOURCE=RefSeq;NEAREST=ENSSSCG00000026568;SIFT=deleterious(0.02)
rs342572060	7:38253828	T	100154751	XM_013977952.2	Transcript	missense_variant	5774	5396	1799	A/V	gCc/gTc	-	IMPACT=MODERATE;STRAND=1;VARIANT_CLASS=SNV;SYMBOL=CUL9;SYMBOL_SOURCE=EntrezGene;HGNC_ID=HGNC:15982;SOURCE=RefSeq;NEAREST=ENSSSCG00000026568;SIFT=deleterious(0.03)
rs334598372	7:38253918	G	ENSSSCG00000030196	ENSSSCT00000030706	Transcript	missense_variant	5870	4316	1439	E/G	gAg/gGg	-	IMPACT=MODERATE;STRAND=1;VARIANT_CLASS=SNV;SYMBOL=CUL9;SYMBOL_SOURCE=HGNC;HGNC_ID=HGNC:15982;SOURCE=Ensembl;NEAREST=ENSSSCG00000026568;SIFT=tolerated(0.14)
rs334598372	7:38253918	G	ENSSSCG00000030196	ENSSSCT00000059861	Transcript	missense_variant	5651	5651	1884	E/G	gAg/gGg	-	IMPACT=MODERATE;STRAND=1;VARIANT_CLASS=SNV;SYMBOL=CUL9;SYMBOL_SOURCE=HGNC;HGNC_ID=HGNC:15982;SOURCE=Ensembl;NEAREST=ENSSSCG00000026568;SIFT=tolerated(0.11)
rs334598372	7:38253918	G	ENSSSCG00000030196	ENSSSCT00000065918	Transcript	missense_variant	5651	5651	1884	E/G	gAg/gGg	-	IMPACT=MODERATE;STRAND=1;VARIANT_CLASS=SNV;SYMBOL=CUL9;SYMBOL_SOURCE=HGNC;HGNC_ID=HGNC:15982;SOURCE=Ensembl;NEAREST=ENSSSCG00000026568;SIFT=tolerated(0.11)
rs334598372	7:38253918	G	100154751	XM_001929268.6	Transcript	missense_variant	6222	5651	1884	E/G	gAg/gGg	-	IMPACT=MODERATE;STRAND=1;VARIANT_CLASS=SNV;SYMBOL=CUL9;SYMBOL_SOURCE=EntrezGene;HGNC_ID=HGNC:15982;SOURCE=RefSeq;NEAREST=ENSSSCG00000026568;SIFT=tolerated(0.11)
rs334598372	7:38253918	G	100154751	XM_013977952.2	Transcript	missense_variant	5864	5486	1829	E/G	gAg/gGg	-	IMPACT=MODERATE;STRAND=1;VARIANT_CLASS=SNV;SYMBOL=CUL9;SYMBOL_SOURCE=EntrezGene;HGNC_ID=HGNC:15982;SOURCE=RefSeq;NEAREST=ENSSSCG00000026568;SIFT=tolerated(0.12)
rs344760480	7:41618512	G	ENSSSCG00000001724	ENSSSCT00000001928	Transcript	missense_variant	1937	1624	542	N/D	Aat/Gat	-	IMPACT=MODERATE;STRAND=1;VARIANT_CLASS=SNV;SOURCE=Ensembl;NEAREST=ENSSSCG00000001724;SIFT=tolerated(1)
rs344760480	7:41618512	G	ENSSSCG00000001724	ENSSSCT00000022332	Transcript	missense_variant	1950	1831	611	N/D	Aat/Gat	-	IMPACT=MODERATE;STRAND=1;VARIANT_CLASS=SNV;SOURCE=Ensembl;NEAREST=ENSSSCG00000001724;SIFT=tolerated(1)
rs344760480	7:41618512	G	100154136	XM_021098804.1	Transcript	missense_variant	1988	1624	542	N/D	Aat/Gat	-	IMPACT=MODERATE;STRAND=1;VARIANT_CLASS=SNV;SYMBOL=MEP1A;SYMBOL_SOURCE=EntrezGene;SOURCE=RefSeq;NEAREST=ENSSSCG00000001724;SIFT=tolerated(1)
._652193	7:43618680	T	ENSSSCG00000001732	ENSSSCT00000001937	Transcript	missense_variant	461	461	154	R/H	cGt/cAt	-	IMPACT=MODERATE;STRAND=-1;VARIANT_CLASS=SNV;SYMBOL=MUT;SYMBOL_SOURCE=EntrezGene;SOURCE=Ensembl;NEAREST=ENSSSCG00000001732;SIFT=tolerated_low_confidence(0.47)
._652193	7:43618680	T	ENSSSCG00000001732	ENSSSCT00000040446	Transcript	missense_variant	866	461	154	R/H	cGt/cAt	-	IMPACT=MODERATE;STRAND=-1;VARIANT_CLASS=SNV;SYMBOL=MUT;SYMBOL_SOURCE=EntrezGene;SOURCE=Ensembl;NEAREST=ENSSSCG00000001732;SIFT=tolerated_low_confidence(0.48)
._652193	7:43618680	T	ENSSSCG00000001732	ENSSSCT00000040749	Transcript	missense_variant	1319	461	154	R/H	cGt/cAt	-	IMPACT=MODERATE;STRAND=-1;VARIANT_CLASS=SNV;SYMBOL=MUT;SYMBOL_SOURCE=EntrezGene;SOURCE=Ensembl;NEAREST=ENSSSCG00000001732;SIFT=tolerated_low_confidence(0.44)
rs341855371	7:47907548	G	ENSSSCG00000027477	ENSSSCT00000001964	Transcript	missense_variant	1458	1345	449	M/V	Atg/Gtg	-	IMPACT=MODERATE;STRAND=1;VARIANT_CLASS=SNV;SYMBOL=TBC1D2B;SYMBOL_SOURCE=HGNC;HGNC_ID=HGNC:29183;SOURCE=Ensembl;NEAREST=100156840;SIFT=tolerated(0.42)
rs341855371	7:47907548	G	ENSSSCG00000027477	ENSSSCT00000027095	Transcript	missense_variant	1691	1270	424	M/V	Atg/Gtg	-	IMPACT=MODERATE;STRAND=1;VARIANT_CLASS=SNV;SYMBOL=TBC1D2B;SYMBOL_SOURCE=HGNC;HGNC_ID=HGNC:29183;SOURCE=Ensembl;NEAREST=100156840;SIFT=tolerated(0.47)
rs80819601	7:48431793	A	ENSSSCG00000001773	ENSSSCT00000001988	Transcript	missense_variant	158	31	11	A/T	Gca/Aca	-	IMPACT=MODERATE;STRAND=1;VARIANT_CLASS=SNV;SYMBOL=TMED3;SYMBOL_SOURCE=HGNC;HGNC_ID=HGNC:28889;SOURCE=Ensembl;NEAREST=ENSSSCG00000001773;SIFT=tolerated(0.57)
rs325591929	7:48524756	A	ENSSSCG00000001775	ENSSSCT00000001990	Transcript	missense_variant	1768	1543	515	V/I	Gtc/Atc	-	IMPACT=MODERATE;STRAND=1;VARIANT_CLASS=SNV;SYMBOL=KIAA1024;SYMBOL_SOURCE=HGNC;HGNC_ID=HGNC:29172;SOURCE=Ensembl;NEAREST=ENSSSCG00000001775;SIFT=tolerated(0.83)
rs325591929	7:48524756	A	ENSSSCG00000001775	ENSSSCT00000043247	Transcript	missense_variant	1407	1339	447	V/I	Gtc/Atc	-	IMPACT=MODERATE;STRAND=1;VARIANT_CLASS=SNV;SYMBOL=KIAA1024;SYMBOL_SOURCE=HGNC;HGNC_ID=HGNC:29172;SOURCE=Ensembl;NEAREST=ENSSSCG00000001775;SIFT=tolerated(0.72)
rs325591929	7:48524756	A	ENSSSCG00000001775	ENSSSCT00000046777	Transcript	missense_variant	1845	1543	515	V/I	Gtc/Atc	-	IMPACT=MODERATE;STRAND=1;VARIANT_CLASS=SNV;SYMBOL=KIAA1024;SYMBOL_SOURCE=HGNC;HGNC_ID=HGNC:29172;SOURCE=Ensembl;NEAREST=ENSSSCG00000001775;SIFT=tolerated(0.69)
rs325591929	7:48524756	A	ENSSSCG00000001775	ENSSSCT00000048628	Transcript	missense_variant	2315	1543	515	V/I	Gtc/Atc	-	IMPACT=MODERATE;STRAND=1;VARIANT_CLASS=SNV;SYMBOL=KIAA1024;SYMBOL_SOURCE=HGNC;HGNC_ID=HGNC:29172;SOURCE=Ensembl;NEAREST=ENSSSCG00000001775;SIFT=tolerated(0.83)
rs325591929	7:48524756	A	ENSSSCG00000001775	ENSSSCT00000063173	Transcript	missense_variant	1801	1543	515	V/I	Gtc/Atc	-	IMPACT=MODERATE;STRAND=1;VARIANT_CLASS=SNV;SYMBOL=KIAA1024;SYMBOL_SOURCE=HGNC;HGNC_ID=HGNC:29172;SOURCE=Ensembl;NEAREST=ENSSSCG00000001775;SIFT=tolerated(0.83)
rs325591929	7:48524756	A	100622753	XM_013988990.2	Transcript	missense_variant	2315	1543	515	V/I	Gtc/Atc	-	IMPACT=MODERATE;STRAND=1;VARIANT_CLASS=SNV;SYMBOL=KIAA1024;SYMBOL_SOURCE=EntrezGene;HGNC_ID=HGNC:29172;SOURCE=RefSeq;NEAREST=ENSSSCG00000001775;SIFT=tolerated(0.83)
rs334588582	7:49780844	A	ENSSSCG00000038929	ENSSSCT00000049090	Transcript	missense_variant	3927	3449	1150	R/K	aGg/aAg	-	IMPACT=MODERATE;STRAND=1;VARIANT_CLASS=SNV;SYMBOL=CEMIP;SYMBOL_SOURCE=HGNC;HGNC_ID=HGNC:29213;SOURCE=Ensembl;NEAREST=ENSSSCG00000021587;SIFT=tolerated(0.3)
rs334588582	7:49780844	A	100738461	XM_021098863.1	Transcript	missense_variant	5723	3449	1150	R/K	aGg/aAg	-	IMPACT=MODERATE;STRAND=1;VARIANT_CLASS=SNV;SYMBOL=CEMIP;SYMBOL_SOURCE=EntrezGene;HGNC_ID=HGNC:29213;SOURCE=RefSeq;NEAREST=ENSSSCG00000021587;SIFT=tolerated(0.3)
rs334588582	7:49780844	A	100738461	XM_021098864.1	Transcript	missense_variant	9289	3449	1150	R/K	aGg/aAg	-	IMPACT=MODERATE;STRAND=1;VARIANT_CLASS=SNV;SYMBOL=CEMIP;SYMBOL_SOURCE=EntrezGene;HGNC_ID=HGNC:29213;SOURCE=RefSeq;NEAREST=ENSSSCG00000021587;SIFT=tolerated(0.3)
rs334588582	7:49780844	A	100738461	XM_021098865.1	Transcript	missense_variant	3735	3449	1150	R/K	aGg/aAg	-	IMPACT=MODERATE;STRAND=1;VARIANT_CLASS=SNV;SYMBOL=CEMIP;SYMBOL_SOURCE=EntrezGene;HGNC_ID=HGNC:29213;SOURCE=RefSeq;NEAREST=ENSSSCG00000021587;SIFT=tolerated(0.3)
rs334588582	7:49780844	A	100738461	XM_021098867.1	Transcript	missense_variant	4533	3449	1150	R/K	aGg/aAg	-	IMPACT=MODERATE;STRAND=1;VARIANT_CLASS=SNV;SYMBOL=CEMIP;SYMBOL_SOURCE=EntrezGene;HGNC_ID=HGNC:29213;SOURCE=RefSeq;NEAREST=ENSSSCG00000021587;SIFT=tolerated(0.3)
._756036	7:50750550	C	ENSSSCG00000038491	ENSSSCT00000061628	Transcript	missense_variant	400	400	134	R/G	Agg/Ggg	-	IMPACT=MODERATE;STRAND=-1;VARIANT_CLASS=SNV;SYMBOL=MEX3B;SYMBOL_SOURCE=HGNC;HGNC_ID=HGNC:25297;SOURCE=Ensembl;NEAREST=ENSSSCG00000038491;SIFT=deleterious(0.03)
._756036	7:50750550	C	110261545	XM_021098868.1	Transcript	missense_variant	1742	400	134	R/G	Agg/Ggg	-	IMPACT=MODERATE;STRAND=-1;VARIANT_CLASS=SNV;SYMBOL=MEX3B;SYMBOL_SOURCE=EntrezGene;HGNC_ID=HGNC:25297;SOURCE=RefSeq;NEAREST=ENSSSCG00000038491;SIFT=deleterious(0.03)
rs338171937	7:52217509	T	ENSSSCG00000035079	ENSSSCT00000046228	Transcript	missense_variant,splice_region_variant	221	221	74	G/D	gGt/gAt	-	IMPACT=MODERATE;STRAND=-1;VARIANT_CLASS=SNV;SOURCE=Ensembl;NEAREST=ENSSSCG00000035079;SIFT=tolerated(1)
rs1111428979	7:52639786	A	ENSSSCG00000036866	ENSSSCT00000049562	Transcript	missense_variant	305	305	102	L/H	cTt/cAt	-	IMPACT=MODERATE;STRAND=1;VARIANT_CLASS=SNV;SOURCE=Ensembl;NEAREST=ENSSSCG00000036866;SIFT=tolerated_low_confidence(1)
._776010	7:52677773	G	ENSSSCG00000034070	ENSSSCT00000046084	Transcript	missense_variant	1807	1694	565	C/S	tGc/tCc	-	IMPACT=MODERATE;STRAND=-1;VARIANT_CLASS=SNV;SYMBOL=ALPK3;SYMBOL_SOURCE=HGNC;HGNC_ID=HGNC:17574;SOURCE=Ensembl;NEAREST=ENSSSCG00000002632;SIFT=tolerated_low_confidence(1)
._776010	7:52677773	G	ENSSSCG00000034070	ENSSSCT00000050612	Transcript	missense_variant	1823	1733	578	C/S	tGc/tCc	-	IMPACT=MODERATE;STRAND=-1;VARIANT_CLASS=SNV;SYMBOL=ALPK3;SYMBOL_SOURCE=HGNC;HGNC_ID=HGNC:17574;SOURCE=Ensembl;NEAREST=ENSSSCG00000002632;SIFT=tolerated_low_confidence(1)
._776010	7:52677773	G	110261548	XM_021098900.1	Transcript	missense_variant	1839	1733	578	C/S	tGc/tCc	-	IMPACT=MODERATE;STRAND=-1;VARIANT_CLASS=SNV;SYMBOL=ALPK3;SYMBOL_SOURCE=EntrezGene;HGNC_ID=HGNC:17574;SOURCE=RefSeq;NEAREST=ENSSSCG00000002632;SIFT=tolerated_low_confidence(1)
._776011	7:52677810	T	ENSSSCG00000034070	ENSSSCT00000046084	Transcript	missense_variant	1770	1657	553	H/N	Cac/Aac	-	IMPACT=MODERATE;STRAND=-1;VARIANT_CLASS=SNV;SYMBOL=ALPK3;SYMBOL_SOURCE=HGNC;HGNC_ID=HGNC:17574;SOURCE=Ensembl;NEAREST=ENSSSCG00000002632;SIFT=tolerated_low_confidence(0.28)
._776011	7:52677810	T	ENSSSCG00000034070	ENSSSCT00000050612	Transcript	missense_variant	1786	1696	566	H/N	Cac/Aac	-	IMPACT=MODERATE;STRAND=-1;VARIANT_CLASS=SNV;SYMBOL=ALPK3;SYMBOL_SOURCE=HGNC;HGNC_ID=HGNC:17574;SOURCE=Ensembl;NEAREST=ENSSSCG00000002632;SIFT=tolerated_low_confidence(0.27)
._776011	7:52677810	T	110261548	XM_021098900.1	Transcript	missense_variant	1802	1696	566	H/N	Cac/Aac	-	IMPACT=MODERATE;STRAND=-1;VARIANT_CLASS=SNV;SYMBOL=ALPK3;SYMBOL_SOURCE=EntrezGene;HGNC_ID=HGNC:17574;SOURCE=RefSeq;NEAREST=ENSSSCG00000002632;SIFT=tolerated_low_confidence(0.27)
rs712812926	7:53479050	G	ENSSSCG00000001818	ENSSSCT00000002037	Transcript	missense_variant,splice_region_variant	1613	809	270	S/C	tCc/tGc	-	IMPACT=MODERATE;STRAND=1;VARIANT_CLASS=SNV;SYMBOL=FES;SYMBOL_SOURCE=HGNC;HGNC_ID=HGNC:3657;SOURCE=Ensembl;NEAREST=100155631;SIFT=tolerated(0.07)
rs712812926	7:53479050	G	100155631	XM_001929355.4	Transcript	missense_variant,splice_region_variant	1613	809	270	S/C	tCc/tGc	-	IMPACT=MODERATE;STRAND=1;VARIANT_CLASS=SNV;SYMBOL=FES;SYMBOL_SOURCE=EntrezGene;HGNC_ID=HGNC:3657;SOURCE=RefSeq;NEAREST=100155631;SIFT=tolerated(0.07)
rs343659732	7:53483708	G	ENSSSCG00000001818	ENSSSCT00000002037	Transcript	missense_variant	3092	2288	763	N/S	aAc/aGc	-	IMPACT=MODERATE;STRAND=1;VARIANT_CLASS=SNV;SYMBOL=FES;SYMBOL_SOURCE=HGNC;HGNC_ID=HGNC:3657;SOURCE=Ensembl;NEAREST=100155631;SIFT=tolerated(0.37)
rs343659732	7:53483708	G	100155631	XM_001929355.4	Transcript	missense_variant	3092	2288	763	N/S	aAc/aGc	-	IMPACT=MODERATE;STRAND=1;VARIANT_CLASS=SNV;SYMBOL=FES;SYMBOL_SOURCE=EntrezGene;HGNC_ID=HGNC:3657;SOURCE=RefSeq;NEAREST=100155631;SIFT=tolerated(0.37)
rs80834938	7:77487157	T	ENSSSCG00000031604	ENSSSCT00000060400	Transcript	missense_variant	113	113	38	F/Y	tTc/tAc	-	IMPACT=MODERATE;STRAND=-1;VARIANT_CLASS=SNV;SYMBOL=TRAV2;SYMBOL_SOURCE=HGNC;HGNC_ID=HGNC:12116;SOURCE=Ensembl;NEAREST=ENSSSCG00000032592;SIFT=deleterious(0.01)
rs81289234	7:78260082	T	ENSSSCG00000031538	ENSSSCT00000044088	Transcript	missense_variant,splice_region_variant	66	64	22	E/K	Gag/Aag	-	IMPACT=MODERATE;STRAND=-1;VARIANT_CLASS=SNV;SYMBOL=ANG;SYMBOL_SOURCE=HGNC;HGNC_ID=HGNC:483;SOURCE=Ensembl;NEAREST=ENSSSCG00000031538;SIFT=tolerated_low_confidence(0.37)
._967326	7:80054995	T	ENSSSCG00000033361	ENSSSCT00000050417	Transcript	missense_variant	790	790	264	A/T	Gct/Act	-	IMPACT=MODERATE;STRAND=-1;VARIANT_CLASS=SNV;SOURCE=Ensembl;NEAREST=ENSSSCG00000033361;SIFT=tolerated_low_confidence(1)
rs80868636	7:80147605	A	ENSSSCG00000002235	ENSSSCT00000002490	Transcript	missense_variant	1868	1211	404	S/N	aGc/aAc	-	IMPACT=MODERATE;STRAND=1;VARIANT_CLASS=SNV;SYMBOL=LPCAT4;SYMBOL_SOURCE=HGNC;HGNC_ID=HGNC:30059;SOURCE=Ensembl;NEAREST=100152542;SIFT=tolerated(1)
rs80868636	7:80147605	A	ENSSSCG00000002235	ENSSSCT00000042097	Transcript	missense_variant	1985	1328	443	S/N	aGc/aAc	-	IMPACT=MODERATE;STRAND=1;VARIANT_CLASS=SNV;SYMBOL=LPCAT4;SYMBOL_SOURCE=HGNC;HGNC_ID=HGNC:30059;SOURCE=Ensembl;NEAREST=100152542;SIFT=tolerated(1)
rs80868636	7:80147605	A	ENSSSCG00000002235	ENSSSCT00000042172	Transcript	missense_variant	1978	1169	390	S/N	aGc/aAc	-	IMPACT=MODERATE;STRAND=1;VARIANT_CLASS=SNV;SYMBOL=LPCAT4;SYMBOL_SOURCE=HGNC;HGNC_ID=HGNC:30059;SOURCE=Ensembl;NEAREST=100152542;SIFT=tolerated(1)
rs80868636	7:80147605	A	ENSSSCG00000002235	ENSSSCT00000065486	Transcript	missense_variant	1391	1124	375	S/N	aGc/aAc	-	IMPACT=MODERATE;STRAND=1;VARIANT_CLASS=SNV;SYMBOL=LPCAT4;SYMBOL_SOURCE=HGNC;HGNC_ID=HGNC:30059;SOURCE=Ensembl;NEAREST=100152542;SIFT=tolerated(0.89)
rs329443729	7:80148152	C	ENSSSCG00000002235	ENSSSCT00000042097	Transcript	missense_variant	2197	1540	514	N/H	Aat/Cat	-	IMPACT=MODERATE;STRAND=1;VARIANT_CLASS=SNV;SYMBOL=LPCAT4;SYMBOL_SOURCE=HGNC;HGNC_ID=HGNC:30059;SOURCE=Ensembl;NEAREST=100152542;SIFT=deleterious_low_confidence(0.01)
rs343913881	7:80967317	A	ENSSSCG00000033958	ENSSSCT00000046623	Transcript	missense_variant	418	418	140	R/W	Cgg/Tgg	-	IMPACT=MODERATE;STRAND=-1;VARIANT_CLASS=SNV;SOURCE=Ensembl;NEAREST=ENSSSCG00000033958;SIFT=deleterious(0)
rs344586633	7:87783619	G	ENSSSCG00000002261	ENSSSCT00000002518	Transcript	missense_variant	70	70	24	T/A	Acc/Gcc	-	IMPACT=MODERATE;STRAND=1;VARIANT_CLASS=SNV;SOURCE=Ensembl;NEAREST=ENSSSCG00000002261;SIFT=tolerated(1)
rs338189110	7:87784014	G	ENSSSCG00000002261	ENSSSCT00000002518	Transcript	missense_variant	356	356	119	E/G	gAg/gGg	-	IMPACT=MODERATE;STRAND=1;VARIANT_CLASS=SNV;SOURCE=Ensembl;NEAREST=ENSSSCG00000002261;SIFT=tolerated(1)
rs338203820	7:87784098	T	ENSSSCG00000002261	ENSSSCT00000002518	Transcript	missense_variant	440	440	147	C/F	tGc/tTc	-	IMPACT=MODERATE;STRAND=1;VARIANT_CLASS=SNV;SOURCE=Ensembl;NEAREST=ENSSSCG00000002261;SIFT=deleterious(0.02)
rs1110214603	7:88263766	G	ENSSSCG00000002258	ENSSSCT00000002515	Transcript	missense_variant	926	926	309	K/T	aAg/aCg	-	IMPACT=MODERATE;STRAND=-1;VARIANT_CLASS=SNV;SYMBOL=KLHL25;SYMBOL_SOURCE=HGNC;HGNC_ID=HGNC:25732;SOURCE=Ensembl;NEAREST=ENSSSCG00000002258;SIFT=tolerated(0.12)
rs45435334	7:96824691	C	ENSSSCG00000002344	ENSSSCT00000002608	Transcript	missense_variant	1600	1536	512	L/F	ttG/ttC	-	IMPACT=MODERATE;STRAND=1;VARIANT_CLASS=SNV;SYMBOL=RIOX1;SYMBOL_SOURCE=HGNC;HGNC_ID=HGNC:20968;SOURCE=Ensembl;NEAREST=ENSSSCG00000002344;SIFT=deleterious(0.03)
rs45435334	7:96824691	C	100523074	XM_005666347.3	Transcript	missense_variant	1619	1536	512	L/F	ttG/ttC	-	IMPACT=MODERATE;STRAND=1;VARIANT_CLASS=SNV;SYMBOL=RIOX1;SYMBOL_SOURCE=EntrezGene;HGNC_ID=HGNC:20968;SOURCE=RefSeq;NEAREST=ENSSSCG00000002344;SIFT=deleterious(0.03)
rs55619011	7:97187301	T	ENSSSCG00000002351	ENSSSCT00000002615	Transcript	missense_variant	612	442	148	G/C	Ggt/Tgt	-	IMPACT=MODERATE;STRAND=1;VARIANT_CLASS=SNV;SOURCE=Ensembl;NEAREST=ENSSSCG00000002351;SIFT=deleterious(0)
rs55619011	7:97187301	T	ENSSSCG00000002351	ENSSSCT00000056698	Transcript	missense_variant	677	442	148	G/C	Ggt/Tgt	-	IMPACT=MODERATE;STRAND=1;VARIANT_CLASS=SNV;SOURCE=Ensembl;NEAREST=ENSSSCG00000002351;SIFT=deleterious(0)
rs55619011	7:97187301	T	ENSSSCG00000002351	ENSSSCT00000057994	Transcript	missense_variant	593	442	148	G/C	Ggt/Tgt	-	IMPACT=MODERATE;STRAND=1;VARIANT_CLASS=SNV;SOURCE=Ensembl;NEAREST=ENSSSCG00000002351;SIFT=deleterious(0)
rs55619011	7:97187301	T	100156930	XM_001929074.5	Transcript	missense_variant	662	442	148	G/C	Ggt/Tgt	-	IMPACT=MODERATE;STRAND=1;VARIANT_CLASS=SNV;SYMBOL=PTGR2;SYMBOL_SOURCE=EntrezGene;SOURCE=RefSeq;NEAREST=ENSSSCG00000002351;SIFT=deleterious(0)
rs55619011	7:97187301	T	100156930	XM_003128657.4	Transcript	missense_variant	645	442	148	G/C	Ggt/Tgt	-	IMPACT=MODERATE;STRAND=1;VARIANT_CLASS=SNV;SYMBOL=PTGR2;SYMBOL_SOURCE=EntrezGene;SOURCE=RefSeq;NEAREST=ENSSSCG00000002351;SIFT=deleterious(0)
rs325610921	7:97252572	A	ENSSSCG00000002353	ENSSSCT00000002617	Transcript	missense_variant	1060	964	322	D/Y	Gac/Tac	-	IMPACT=MODERATE;STRAND=-1;VARIANT_CLASS=SNV;SYMBOL=FAM161B;SYMBOL_SOURCE=HGNC;HGNC_ID=HGNC:19854;SOURCE=Ensembl;NEAREST=ENSSSCG00000002353;SIFT=deleterious(0)
rs343426910	7:97278827	C	ENSSSCG00000002355	ENSSSCT00000002619	Transcript	missense_variant	1243	1082	361	K/R	aAg/aGg	-	IMPACT=MODERATE;STRAND=-1;VARIANT_CLASS=SNV;SYMBOL=ENTPD5;SYMBOL_SOURCE=HGNC;HGNC_ID=HGNC:3367;SOURCE=Ensembl;NEAREST=ENSSSCG00000002355;SIFT=tolerated(0.2)
rs343426910	7:97278827	C	ENSSSCG00000002355	ENSSSCT00000038339	Transcript	missense_variant	1212	1079	360	K/R	aAg/aGg	-	IMPACT=MODERATE;STRAND=-1;VARIANT_CLASS=SNV;SYMBOL=ENTPD5;SYMBOL_SOURCE=HGNC;HGNC_ID=HGNC:3367;SOURCE=Ensembl;NEAREST=ENSSSCG00000002355;SIFT=tolerated(0.23)
rs343426910	7:97278827	C	ENSSSCG00000002355	ENSSSCT00000038395	Transcript	missense_variant	1370	1079	360	K/R	aAg/aGg	-	IMPACT=MODERATE;STRAND=-1;VARIANT_CLASS=SNV;SYMBOL=ENTPD5;SYMBOL_SOURCE=HGNC;HGNC_ID=HGNC:3367;SOURCE=Ensembl;NEAREST=ENSSSCG00000002355;SIFT=tolerated(0.2)
rs343426910	7:97278827	C	ENSSSCG00000002355	ENSSSCT00000048210	Transcript	missense_variant	1267	1079	360	K/R	aAg/aGg	-	IMPACT=MODERATE;STRAND=-1;VARIANT_CLASS=SNV;SYMBOL=ENTPD5;SYMBOL_SOURCE=HGNC;HGNC_ID=HGNC:3367;SOURCE=Ensembl;NEAREST=ENSSSCG00000002355;SIFT=tolerated(0.2)
rs343426910	7:97278827	C	ENSSSCG00000002355	ENSSSCT00000051042	Transcript	missense_variant	1250	1082	361	K/R	aAg/aGg	-	IMPACT=MODERATE;STRAND=-1;VARIANT_CLASS=SNV;SYMBOL=ENTPD5;SYMBOL_SOURCE=HGNC;HGNC_ID=HGNC:3367;SOURCE=Ensembl;NEAREST=ENSSSCG00000002355;SIFT=tolerated(0.2)
rs343426910	7:97278827	C	ENSSSCG00000002355	ENSSSCT00000051841	Transcript	missense_variant	1264	1079	360	K/R	aAg/aGg	-	IMPACT=MODERATE;STRAND=-1;VARIANT_CLASS=SNV;SYMBOL=ENTPD5;SYMBOL_SOURCE=HGNC;HGNC_ID=HGNC:3367;SOURCE=Ensembl;NEAREST=ENSSSCG00000002355;SIFT=tolerated(0.2)
rs343426910	7:97278827	C	ENSSSCG00000002355	ENSSSCT00000054595	Transcript	missense_variant	2918	875	292	K/R	aAg/aGg	-	IMPACT=MODERATE;STRAND=-1;VARIANT_CLASS=SNV;SYMBOL=ENTPD5;SYMBOL_SOURCE=HGNC;HGNC_ID=HGNC:3367;SOURCE=Ensembl;NEAREST=ENSSSCG00000002355;SIFT=tolerated(0.19)
rs343426910	7:97278827	C	100154506	XM_005656398.3	Transcript	missense_variant	1841	1079	360	K/R	aAg/aGg	-	IMPACT=MODERATE;STRAND=-1;VARIANT_CLASS=SNV;SYMBOL=ENTPD5;SYMBOL_SOURCE=EntrezGene;HGNC_ID=HGNC:3367;SOURCE=RefSeq;NEAREST=ENSSSCG00000002355;SIFT=tolerated(0.2)
rs343426910	7:97278827	C	100154506	XM_013989157.2	Transcript	missense_variant	1796	1082	361	K/R	aAg/aGg	-	IMPACT=MODERATE;STRAND=-1;VARIANT_CLASS=SNV;SYMBOL=ENTPD5;SYMBOL_SOURCE=EntrezGene;HGNC_ID=HGNC:3367;SOURCE=RefSeq;NEAREST=ENSSSCG00000002355;SIFT=tolerated(0.2)
rs343426910	7:97278827	C	100154506	XM_021099502.1	Transcript	missense_variant	1365	1082	361	K/R	aAg/aGg	-	IMPACT=MODERATE;STRAND=-1;VARIANT_CLASS=SNV;SYMBOL=ENTPD5;SYMBOL_SOURCE=EntrezGene;HGNC_ID=HGNC:3367;SOURCE=RefSeq;NEAREST=ENSSSCG00000002355;SIFT=tolerated(0.2)
rs343426910	7:97278827	C	100154506	XM_021099503.1	Transcript	missense_variant	1501	1082	361	K/R	aAg/aGg	-	IMPACT=MODERATE;STRAND=-1;VARIANT_CLASS=SNV;SYMBOL=ENTPD5;SYMBOL_SOURCE=EntrezGene;HGNC_ID=HGNC:3367;SOURCE=RefSeq;NEAREST=ENSSSCG00000002355;SIFT=tolerated(0.2)
rs343426910	7:97278827	C	100154506	XM_021099504.1	Transcript	missense_variant	1753	1082	361	K/R	aAg/aGg	-	IMPACT=MODERATE;STRAND=-1;VARIANT_CLASS=SNV;SYMBOL=ENTPD5;SYMBOL_SOURCE=EntrezGene;HGNC_ID=HGNC:3367;SOURCE=RefSeq;NEAREST=ENSSSCG00000002355;SIFT=tolerated(0.2)
rs343426910	7:97278827	C	100154506	XM_021099505.1	Transcript	missense_variant	1265	1082	361	K/R	aAg/aGg	-	IMPACT=MODERATE;STRAND=-1;VARIANT_CLASS=SNV;SYMBOL=ENTPD5;SYMBOL_SOURCE=EntrezGene;HGNC_ID=HGNC:3367;SOURCE=RefSeq;NEAREST=ENSSSCG00000002355;SIFT=tolerated(0.2)
rs343426910	7:97278827	C	100154506	XM_021099506.1	Transcript	missense_variant	1757	1082	361	K/R	aAg/aGg	-	IMPACT=MODERATE;STRAND=-1;VARIANT_CLASS=SNV;SYMBOL=ENTPD5;SYMBOL_SOURCE=EntrezGene;HGNC_ID=HGNC:3367;SOURCE=RefSeq;NEAREST=ENSSSCG00000002355;SIFT=tolerated(0.2)
rs343426910	7:97278827	C	100154506	XM_021099507.1	Transcript	missense_variant	1447	1082	361	K/R	aAg/aGg	-	IMPACT=MODERATE;STRAND=-1;VARIANT_CLASS=SNV;SYMBOL=ENTPD5;SYMBOL_SOURCE=EntrezGene;HGNC_ID=HGNC:3367;SOURCE=RefSeq;NEAREST=ENSSSCG00000002355;SIFT=tolerated(0.2)
rs343426910	7:97278827	C	100154506	XM_021099508.1	Transcript	missense_variant	1362	1079	360	K/R	aAg/aGg	-	IMPACT=MODERATE;STRAND=-1;VARIANT_CLASS=SNV;SYMBOL=ENTPD5;SYMBOL_SOURCE=EntrezGene;HGNC_ID=HGNC:3367;SOURCE=RefSeq;NEAREST=ENSSSCG00000002355;SIFT=tolerated(0.2)
rs343426910	7:97278827	C	100154506	XM_021099509.1	Transcript	missense_variant	1516	1079	360	K/R	aAg/aGg	-	IMPACT=MODERATE;STRAND=-1;VARIANT_CLASS=SNV;SYMBOL=ENTPD5;SYMBOL_SOURCE=EntrezGene;HGNC_ID=HGNC:3367;SOURCE=RefSeq;NEAREST=ENSSSCG00000002355;SIFT=tolerated(0.2)
rs343426910	7:97278827	C	100154506	XM_021099511.1	Transcript	missense_variant	1781	1079	360	K/R	aAg/aGg	-	IMPACT=MODERATE;STRAND=-1;VARIANT_CLASS=SNV;SYMBOL=ENTPD5;SYMBOL_SOURCE=EntrezGene;HGNC_ID=HGNC:3367;SOURCE=RefSeq;NEAREST=ENSSSCG00000002355;SIFT=tolerated(0.2)
rs343426910	7:97278827	C	100154506	XM_021099512.1	Transcript	missense_variant	1262	1079	360	K/R	aAg/aGg	-	IMPACT=MODERATE;STRAND=-1;VARIANT_CLASS=SNV;SYMBOL=ENTPD5;SYMBOL_SOURCE=EntrezGene;HGNC_ID=HGNC:3367;SOURCE=RefSeq;NEAREST=ENSSSCG00000002355;SIFT=tolerated(0.2)
rs343426910	7:97278827	C	100154506	XM_021099513.1	Transcript	missense_variant	1814	1079	360	K/R	aAg/aGg	-	IMPACT=MODERATE;STRAND=-1;VARIANT_CLASS=SNV;SYMBOL=ENTPD5;SYMBOL_SOURCE=EntrezGene;HGNC_ID=HGNC:3367;SOURCE=RefSeq;NEAREST=ENSSSCG00000002355;SIFT=tolerated(0.2)
rs343426910	7:97278827	C	100154506	XM_021099514.1	Transcript	missense_variant	1442	1079	360	K/R	aAg/aGg	-	IMPACT=MODERATE;STRAND=-1;VARIANT_CLASS=SNV;SYMBOL=ENTPD5;SYMBOL_SOURCE=EntrezGene;HGNC_ID=HGNC:3367;SOURCE=RefSeq;NEAREST=ENSSSCG00000002355;SIFT=tolerated(0.2)
rs343426910	7:97278827	C	100154506	XM_021099515.1	Transcript	missense_variant	1696	1079	360	K/R	aAg/aGg	-	IMPACT=MODERATE;STRAND=-1;VARIANT_CLASS=SNV;SYMBOL=ENTPD5;SYMBOL_SOURCE=EntrezGene;HGNC_ID=HGNC:3367;SOURCE=RefSeq;NEAREST=ENSSSCG00000002355;SIFT=tolerated(0.2)
rs341925116	7:99435687	G	ENSSSCG00000036533	ENSSSCT00000050211	Transcript	missense_variant	290	290	97	K/R	aAa/aGa	-	IMPACT=MODERATE;STRAND=1;VARIANT_CLASS=SNV;SOURCE=Ensembl;NEAREST=ENSSSCG00000036533;SIFT=tolerated(0.09)
